# Supplementary material
Source: publisher site journal article supplement (https://www.dovepress.com/get_supplementary_file.php?f=293717.xlsx)
Supplement: Supplementary file 2 [file get_supplementary_file.php]

## Sheet: Supplementary file 4 (KAP on PP
Serial	1. Age (years)	age category	2. Sex	3. Marital Status	married or single	4. Occupation	physician or not	5. Years of experience	experience category	6. Highest level of education	education category	7. Number of household (living place) members	1. Type of establishment you are working in	Have you ever read the WHO, CDC, or national guideline on the proper and rational use of PPE?	2. You are currently working at	duty station type	duty station indoor	duty station outdoor	duty station emergency	duty station pharmacy	duty station laboratory	duty station icu	multiple duty stations	3. Duty hours per week	duty hours categry	4. Place of living during duty period	place of liver category	living place home	living place hotel	living place dorm	living place hostel	5. Transportation to and from workplace	transportation category	public trasport	office transport	walking	private transport	1. Are you aware about the risks of COVID-19 pandemic for the patients and healthcare workers?	2. Do you understand how to protect yourself and your patients during COVID-19 pandemic?	3. Do you think all the following components are the parts of personal protective equipment (PPE): Surgical mask, N95 or equivalent mask, Gown or cover-all, Gloves, Goggles, Face shield?	4. Do you think hand hygiene is necessary along with PPE for the protection from COVID-19?	5. Do you know how to put on (donning) and put off (doffing) PPE correctly?	6. Do you think all the components of PPE (Surgical mask, N95 or equivalent mask, Gown or cover-all, Gloves, Goggles, Face shield) are necessary to wear while providing direct care to the COVID-19 patients?	7. Is N95 or equivalent mask mandatory with other protective equipment during aerosol-generating procedures (e.g., artificial ventilation, giving high flow oxygen through a face mask or nasal prong) on COVID-19 patients?	8. Do you think all the components of PPE except N95 mask are required while treating the patients with respiratory symptoms at the hospital outdoor?	9. Do you think the surgical mask and hygiene practice are sufficient as a protective measure for the family members during providing care to COVID-19 patients in the person’s own home?	10. Do you think general people should wear a surgical mask or a cotton mask and maintain hygiene practice to get protection from getting COVID-19 infection?	1. N95 or equivalent mask is mandatory for all the frontline healthcare workers.	2. PPE must be used in combination with other precautionary measures such as hand hygiene.
1	32	31 - 40	Male	Married	Married	Physician	Physician	7	> 4 years	Bachelor	Bachelor and above	4	Private	Yes	Indoor	Indoor	Yes	No	No	No	No	No	No	48 +	>36	Home	Home	Yes	No	No	No	By private vehicle	private transport	No	No	No	Yes	Yes	Yes	Yes	Yes	Yes	Yes	Yes	Yes	Yes	Yes	Strongly agree	Strongly agree
2	28	21 - 30	Female	Unmarried	Single	Physician	Physician	2	< = 4 years	Masters	Bachelor and above	5	Private	Yes	Indoor	Indoor	Yes	No	No	No	No	No	No	36+	<=36	Home	Home	Yes	No	No	No	By private vehicle	private transport	No	No	No	Yes	Yes	Yes	Yes	Yes	Yes	Yes	Yes	Yes	No	Yes	Strongly agree	Strongly agree
3	27	21 - 30	Female	Married	Married	Physician	Physician	2	< = 4 years	Bachelor	Bachelor and above	3	Government	Yes	Outdoor	Outdoor	No	Yes	No	No	No	No	No	36+	<=36	Dormitory	Dormitory	No	No	Yes	No	By walk	Walking	No	No	Yes	No	Yes	Yes	Yes	Yes	Yes	Yes	Yes	Yes	No	Yes	Strongly agree	Strongly agree
4	25	21 - 30	Female	Married	Married	Physician	Physician	2	< = 4 years	Bachelor	Bachelor and above	2	Government	Yes	Outdoor	Outdoor	No	Yes	No	No	No	No	No	36+	<=36	Dormitory	Dormitory	No	No	Yes	No	By walk	Walking	No	No	Yes	No	Yes	Yes	Yes	Yes	No	Yes	Yes	No	No	Yes	Strongly agree	Strongly agree
5	31	31 - 40	Male	Unmarried	Single	Physician	Physician	7	> 4 years	Masters	Bachelor and above	1	Government	Yes	Outdoor	Outdoor	No	Yes	No	No	No	No	No	36+	<=36	Hostel	Hostel	No	No	No	Yes	By walk	Walking	No	No	Yes	No	Yes	Yes	Yes	Yes	Yes	Yes	Yes	Yes	Yes	Yes	Strongly agree	Agree
6	25	21 - 30	Male	Unmarried	Single	Physician	Physician	2	< = 4 years	Bachelor	Bachelor and above	4	Government	Yes	Indoor	Indoor	Yes	No	No	No	No	No	No	48 +	>36	Hotel	Hotel	No	Yes	No	No	By office transport	office transport	No	Yes	No	No	Yes	Yes	Yes	Yes	No	Yes	Yes	Yes	No	Yes	Strongly agree	Strongly agree
7	32	31 - 40	Male	Married	Married	Physician	Physician	8	> 4 years	Bachelor	Bachelor and above	4	Government	No	Dental OPD	Outdoor	No	Yes	No	No	No	No	No	36+	<=36	Home	Home	Yes	No	No	No	By public transport	public transport	Yes	No	No	No	Yes	Yes	Yes	Yes	Yes	Yes	Yes	Yes	Yes	Yes	Strongly agree	Strongly agree
8	27	21 - 30	Male	Unmarried	Single	Physician	Physician	1	< = 4 years	Bachelor	Bachelor and above	4	Private	Yes	working in both indoor and outdoor by rotation	More than one place	Yes	No	No	No	No	No	Yes	48 +	>36	Hospital	Hospital	No	No	No	No	By public transport	public transport	Yes	No	No	No	Yes	Yes	Yes	Yes	Yes	Yes	Yes	Yes	No	Yes	Strongly agree	Strongly agree
9	30	21 - 30	Male	Unmarried	Single	Physician	Physician	5	> 4 years	Bachelor	Bachelor and above	2	Private	Yes	Emergency	Emergency	No	No	Yes	No	No	No	No	48 +	>36	Home	Home	Yes	No	No	No	By office transport	office transport	No	Yes	No	No	Yes	Yes	Yes	Yes	Yes	Yes	Yes	No	Yes	Yes	Agree	Strongly agree
10	29	21 - 30	Male	Married	Married	Physician	Physician	4	< = 4 years	Bachelor	Bachelor and above	8	Government	No	Outdoor	Outdoor	No	Yes	No	No	No	No	No	36+	<=36	Hospital	Hospital	No	No	No	No	By public transport	public transport	Yes	No	No	No	Yes	Yes	Yes	Yes	Yes	Yes	Yes	No	Yes	Yes	Agree	Agree
11	29	21 - 30	Male	Unmarried	Single	Physician	Physician	3	< = 4 years	Bachelor	Bachelor and above	4	Private	Yes	Indoor	Indoor	Yes	No	No	No	No	No	No	36+	<=36	Home	Home	Yes	No	No	No	By public transport	public transport	Yes	No	No	No	Yes	Yes	Yes	Yes	Yes	Yes	Yes	Yes	No	Yes	Strongly agree	Strongly agree
12	28	21 - 30	Female	Unmarried	Single	Physician	Physician	4	< = 4 years	Bachelor	Bachelor and above	4	Government	Yes	Emergency	Emergency	No	No	Yes	No	No	No	No	48 +	>36	Hospital	Hospital	No	No	No	No	By private vehicle	private transport	No	No	No	Yes	Yes	Yes	Yes	Yes	Yes	Yes	Yes	Yes	Yes	Yes	Strongly agree	Strongly agree
13	31	31 - 40	Female	Widowed	Single	Physician	Physician	5	> 4 years	Bachelor	Bachelor and above	7	Government	Yes	Indoor	Indoor	Yes	No	No	No	No	No	No	60 +	>36	Hotel	Hotel	No	Yes	No	No	By walk	Walking	No	No	Yes	No	Yes	Yes	Yes	Yes	Yes	Yes	Yes	Yes	No	Yes	Strongly agree	Strongly agree
14	29	21 - 30	Male	Unmarried	Single	Physician	Physician	3	< = 4 years	Bachelor	Bachelor and above	4	Government	No	Indoor	Indoor	Yes	No	No	No	No	No	No	24 +	<=36	Home	Home	Yes	No	No	No	By private vehicle	private transport	No	No	No	Yes	Yes	Yes	Yes	Yes	No	Yes	Yes	Yes	No	Yes	Strongly agree	Strongly agree
15	29	21 - 30	Male	Married	Married	Physician	Physician	6	> 4 years	Bachelor	Bachelor and above	6	Government	Yes	Outdoor	Outdoor	No	Yes	No	No	No	No	No	48 +	>36	Home	Home	Yes	No	No	No	By public transport	public transport	Yes	No	No	No	Yes	Yes	Yes	Yes	Yes	Yes	Yes	Yes	Yes	Yes	Agree	Strongly agree
16	24	21 - 30	Female	Unmarried	Single	Nurse	Non-physician	3	< = 4 years	Diploma	Diploma	1	Private	Yes	Indoor	Indoor	Yes	No	No	No	No	No	No	48 +	>36	Hostel	Hostel	No	No	No	Yes	By walk	Walking	No	No	Yes	No	Yes	Yes	Yes	Yes	Yes	Yes	No	No	No	Yes	Agree	Strongly agree
17	27	21 - 30	Male	Married	Married	Physician	Physician	3	< = 4 years	Bachelor	Bachelor and above	2	Private	No	Outdoor	Outdoor	No	Yes	No	No	No	No	No	48 +	>36	Hospital	Hospital	No	No	No	No	By public transport	public transport	Yes	No	No	No	Yes	Yes	Yes	Yes	Yes	Yes	Yes	No	Yes	Yes	Strongly agree	Strongly agree
18	28	21 - 30	Male	Unmarried	Single	Physician	Physician	5	> 4 years	Bachelor	Bachelor and above	3	Private	Yes	ICU (Intensive Care Unit)	ICU	No	No	No	No	No	Yes	No	24 +	<=36	Hospital	Hospital	No	No	No	No	By private vehicle	private transport	No	No	No	Yes	Yes	Yes	Yes	Yes	Yes	Yes	Yes	Yes	No	Yes	Strongly disagree	Strongly agree
19	27	21 - 30	Male	Married	Married	Physician	Physician	4	< = 4 years	Bachelor	Bachelor and above	4	Government	Yes	Outdoor	Outdoor	No	Yes	No	No	No	No	No	48 +	>36	Home	Home	Yes	No	No	No	By private vehicle	private transport	No	No	No	Yes	Yes	Yes	Yes	Yes	Yes	Yes	Yes	Yes	No	Yes	Strongly agree	Strongly agree
20	26	21 - 30	Male	Unmarried	Single	Physician	Physician	3	< = 4 years	Bachelor	Bachelor and above	4	Government	Yes	Indoor	Indoor	Yes	No	No	No	No	No	No	36+	<=36	Hospital	Hospital	No	No	No	No	By office transport	office transport	No	Yes	No	No	Yes	Yes	Yes	Yes	Yes	Yes	Yes	No	No	Yes	Strongly agree	Agree
21	25	21 - 30	Female	Married	Married	Physician	Physician	3	< = 4 years	Bachelor	Bachelor and above	4	Government	No	Outdoor	Outdoor	No	Yes	No	No	No	No	No	36+	<=36	Home	Home	Yes	No	No	No	By public transport	public transport	Yes	No	No	No	Yes	Yes	Yes	Yes	Yes	Yes	Yes	No	No	Yes	Strongly agree	Strongly agree
22	27	21 - 30	Female	Married	Married	Physician	Physician	3	< = 4 years	Bachelor	Bachelor and above	15	Government	Yes	Outdoor	Outdoor	No	Yes	No	No	No	No	No	36+	<=36	Home	Home	Yes	No	No	No	By private vehicle	private transport	No	No	No	Yes	Yes	Yes	Yes	Yes	Yes	Yes	Yes	Yes	No	Yes	Strongly agree	Strongly agree
23	27	21 - 30	Male	Unmarried	Single	Physician	Physician	2.5	< = 4 years	Bachelor	Bachelor and above	3	Government	No	Outdoor	Outdoor	No	Yes	No	No	No	No	No	36+	<=36	Hospital	Hospital	No	No	No	No	By private vehicle	private transport	No	No	No	Yes	Yes	Yes	Yes	Yes	Yes	Yes	Yes	No	Yes	Yes	Strongly agree	Strongly agree
24	26	21 - 30	Male	Unmarried	Single	Physician	Physician	1	< = 4 years	Bachelor	Bachelor and above	3	Private	Yes	Indoor	Indoor	Yes	No	No	No	No	No	No	36+	<=36	Hotel	Hotel	No	Yes	No	No	By private vehicle	private transport	No	No	No	Yes	Yes	Yes	Yes	Yes	Yes	Yes	Yes	No	Yes	Yes	Strongly agree	Strongly agree
25	25	21 - 30	Female	Unmarried	Single	Physician	Physician	1	< = 4 years	Bachelor	Bachelor and above	4	Private	No	Indoor	Indoor	Yes	No	No	No	No	No	No	24 +	<=36	Hostel	Hostel	No	No	No	Yes	By walk	Walking	No	No	Yes	No	Yes	Yes	Yes	Yes	No	Yes	Yes	No	No	Yes	Strongly agree	Strongly agree
26	26	21 - 30	Male	Married	Married	Physician	Physician	5	> 4 years	Bachelor	Bachelor and above	4	Private	No	Outdoor	Outdoor	No	Yes	No	No	No	No	No	36+	<=36	Home	Home	Yes	No	No	No	By walk	Walking	No	No	Yes	No	Yes	Yes	Yes	Yes	No	Yes	Yes	Yes	Yes	Yes	Strongly agree	Strongly agree
27	25	21 - 30	Female	Married	Married	Physician	Physician	0	< = 4 years	Bachelor	Bachelor and above	4	Private	Yes	Outdoor	Outdoor	No	Yes	No	No	No	No	No	36+	<=36	Hostel	Hostel	No	No	No	Yes	By walk	Walking	No	No	Yes	No	Yes	Yes	Yes	Yes	Yes	Yes	Yes	No	No	Yes	Strongly agree	Strongly agree
28	28	21 - 30	Female	Married	Married	Physician	Physician	3	< = 4 years	Bachelor	Bachelor and above	9	Government	Yes	Indoor	Indoor	Yes	No	No	No	No	No	No	36+	<=36	Hotel	Hotel	No	Yes	No	No	By office transport	office transport	No	Yes	No	No	Yes	Yes	Yes	Yes	Yes	Yes	Yes	No	No	Yes	Strongly agree	Strongly agree
29	34	31 - 40	Male	Married	Married	Physician	Physician	10	> 4 years	Masters	Bachelor and above	4	Private	Yes	ICU (Intensive Care Unit)	ICU	No	No	No	No	No	Yes	No	36+	<=36	Home	Home	Yes	No	No	No	By private vehicle	private transport	No	No	No	Yes	Yes	Yes	Yes	Yes	Yes	Yes	Yes	Yes	Yes	Yes	Strongly agree	Strongly agree
30	27	21 - 30	Male	Unmarried	Single	Physician	Physician	2	< = 4 years	Bachelor	Bachelor and above	4	Private	Yes	Indoor	Indoor	Yes	No	No	No	No	No	No	36+	<=36	Home	Home	Yes	No	No	No	By private vehicle	private transport	No	No	No	Yes	Yes	Yes	Yes	Yes	Yes	Yes	Yes	No	No	Yes	Strongly agree	Strongly agree
31	27	21 - 30	Female	Unmarried	Single	Physician	Physician	2	< = 4 years	Bachelor	Bachelor and above	3	Private	Yes	Outdoor	Outdoor	No	Yes	No	No	No	No	No	24 +	<=36	Home	Home	Yes	No	No	No	By office transport	office transport	No	Yes	No	No	Yes	Yes	Yes	Yes	Yes	Yes	Yes	Yes	No	No	Strongly agree	Strongly agree
32	24	21 - 30	Female	Unmarried	Single	Physician	Physician	1.5	< = 4 years	Bachelor	Bachelor and above	2	Government	Yes	Outdoor	Outdoor	No	Yes	No	No	No	No	No	24 +	<=36	Dormitory	Dormitory	No	No	Yes	No	By walk	Walking	No	No	Yes	No	Yes	Yes	Yes	Yes	Yes	Yes	Yes	No	No	Yes	Strongly agree	Agree
33	25	21 - 30	Female	Unmarried	Single	Physician	Physician	1	< = 4 years	Bachelor	Bachelor and above	3	Private	Yes	Outdoor	Outdoor	No	Yes	No	No	No	No	No	36+	<=36	Hospital	Hospital	No	No	No	No	By public transport	public transport	Yes	No	No	No	Yes	Yes	Yes	Yes	No	Yes	Yes	Yes	No	Yes	Strongly agree	Agree
34	24	21 - 30	Female	Unmarried	Single	Nurse	Non-physician	2	< = 4 years	Diploma	Diploma	1	Private	Yes	Indoor	Indoor	Yes	No	No	No	No	No	No	48 +	>36	Home	Home	Yes	No	No	No	By walk	Walking	No	No	Yes	No	No	Yes	Yes	Yes	Yes	Yes	Yes	Yes	Yes	Yes	Strongly agree	Agree
35	35	31 - 40	Female	Married	Married	Physician	Physician	10	> 4 years	Masters	Bachelor and above	6	Government	Yes	Indoor	Indoor	Yes	No	No	No	No	No	No	12 +	<=36	Home	Home	Yes	No	No	No	By private vehicle	private transport	No	No	No	Yes	Yes	Yes	Yes	Yes	Yes	Yes	Yes	Yes	No	Yes	Strongly agree	Strongly agree
36	35	31 - 40	Male	Married	Married	Physician	Physician	10	> 4 years	Masters	Bachelor and above	5	Government	Yes	Indoor	Indoor	Yes	No	No	No	No	No	No	36+	<=36	Dormitory	Dormitory	No	No	Yes	No	By public transport	public transport	Yes	No	No	No	Yes	Yes	Yes	Yes	Yes	Yes	Yes	Yes	Yes	Yes	Strongly disagree	Strongly agree
37	29	21 - 30	Male	Married	Married	Physician	Physician	3	< = 4 years	Bachelor	Bachelor and above	1	Government	Yes	Indoor	Indoor	Yes	No	No	No	No	No	No	24 +	<=36	Dormitory	Dormitory	No	No	Yes	No	By office transport	office transport	No	Yes	No	No	Yes	Yes	Yes	Yes	Yes	Yes	Yes	No	No	Yes	Strongly agree	Strongly agree
38	35	31 - 40	Female	Married	Married	Physician	Physician	10	> 4 years	Bachelor	Bachelor and above	3	Government	No	Outdoor	Outdoor	No	Yes	No	No	No	No	No	36+	<=36	Home	Home	Yes	No	No	No	By private vehicle	private transport	No	No	No	Yes	Yes	Yes	Yes	Yes	Yes	Yes	Yes	No	Yes	Yes	Strongly agree	Strongly agree
39	26	21 - 30	Male	Unmarried	Single	Physician	Physician	2	< = 4 years	Bachelor	Bachelor and above	2	Private	Yes	Indoor, Outdoor	More than one place	Yes	Yes	No	No	No	No	Yes	48 +	>36	Hospital	Hospital	No	No	No	No	By office transport	office transport	No	Yes	No	No	Yes	Yes	Yes	Yes	Yes	Yes	Yes	Yes	Yes	Yes	Strongly agree	Strongly agree
40	34	31 - 40	Male	Married	Married	Physician	Physician	10	> 4 years	Masters	Bachelor and above	3	Government	Yes	Indoor	Indoor	Yes	No	No	No	No	No	No	24 +	<=36	Hotel	Hotel	No	Yes	No	No	By office transport	office transport	No	Yes	No	No	Yes	Yes	Yes	Yes	Yes	Yes	Yes	No	Yes	Yes	Strongly agree	Strongly agree
41	34	31 - 40	Male	Married	Married	Physician	Physician	8	> 4 years	Bachelor	Bachelor and above	4	Government	Yes	Indoor	Indoor	Yes	No	No	No	No	No	No	36+	<=36	Hotel	Hotel	No	Yes	No	No	By office transport	office transport	No	Yes	No	No	Yes	Yes	Yes	Yes	Yes	Yes	Yes	Yes	Yes	Yes	Strongly agree	Strongly agree
42	34	31 - 40	Female	Married	Married	Physician	Physician	10	> 4 years	Masters	Bachelor and above	10	Government	Yes	Indoor	Indoor	Yes	No	No	No	No	No	No	24 +	<=36	Home	Home	Yes	No	No	No	By private vehicle	private transport	No	No	No	Yes	Yes	Yes	Yes	Yes	Yes	Yes	Yes	No	No	Yes	Strongly agree	Strongly agree
43	26	21 - 30	Male	Married	Married	Physician	Physician	3	< = 4 years	Bachelor	Bachelor and above	2	Government	Yes	Outdoor	Outdoor	No	Yes	No	No	No	No	No	48 +	>36	Hospital	Hospital	No	No	No	No	By office transport	office transport	No	Yes	No	No	Yes	Yes	Yes	Yes	Yes	Yes	Yes	No	Yes	Yes	Strongly agree	Neither agree nor disagree
44	32	31 - 40	Male	Married	Married	Physician	Physician	5	> 4 years	Masters	Bachelor and above	8	Private	Yes	Indoor, Pharmacy	More than one place	Yes	No	No	Yes	No	No	Yes	36+	<=36	Home	Home	Yes	No	No	No	By public transport	public transport	Yes	No	No	No	Yes	Yes	Yes	Yes	Yes	Yes	Yes	No	Yes	Yes	Strongly agree	Strongly agree
45	30	21 - 30	Male	Married	Married	Physician	Physician	5	> 4 years	Bachelor	Bachelor and above	3	Government	Yes	Indoor, Emergency	More than one place	Yes	No	Yes	No	No	No	Yes	48 +	>36	Home	Home	Yes	No	No	No	By private vehicle	private transport	No	No	No	Yes	Yes	Yes	Yes	Yes	Yes	Yes	Yes	Yes	Yes	Yes	Strongly agree	Strongly agree
46	29	21 - 30	Female	Unmarried	Single	Physician	Physician	6	> 4 years	Bachelor	Bachelor and above	8	Private	Yes	Emergency	Emergency	No	No	Yes	No	No	No	No	12 +	<=36	Home	Home	Yes	No	No	No	By walk	Walking	No	No	Yes	No	Yes	Yes	Yes	Yes	Yes	Yes	Yes	Yes	No	Yes	Strongly agree	Strongly agree
47	35	31 - 40	Male	Married	Married	Physician	Physician	13	> 4 years	Masters	Bachelor and above	11	Private	Yes	Outdoor, Operation theater because of surgeon	More than one place	No	Yes	No	No	No	No	Yes	36+	<=36	Home	Home	Yes	No	No	No	By private vehicle	private transport	No	No	No	Yes	Yes	Yes	Yes	Yes	Yes	Yes	Yes	Yes	Yes	Yes	Strongly agree	Strongly agree
48	27	21 - 30	Female	Married	Married	Physician	Physician	2	< = 4 years	Bachelor	Bachelor and above	3	Government	Yes	Outdoor	Outdoor	No	Yes	No	No	No	No	No	24 +	<=36	Dormitory	Dormitory	No	No	Yes	No	By walk	Walking	No	No	Yes	No	Yes	Yes	Yes	Yes	Yes	Yes	Yes	No	Yes	Yes	Strongly agree	Strongly agree
49	26	21 - 30	Male	Unmarried	Single	Physician	Physician	2	< = 4 years	Bachelor	Bachelor and above	8	Government	Yes	Outdoor	Outdoor	No	Yes	No	No	No	No	No	36+	<=36	Dormitory	Dormitory	No	No	Yes	No	By walk	Walking	No	No	Yes	No	Yes	Yes	Yes	Yes	Yes	Yes	Yes	Yes	Yes	Yes	Strongly agree	Strongly agree
50	26	21 - 30	Male	Unmarried	Single	Physician	Physician	3	< = 4 years	Bachelor	Bachelor and above	6	Government	Yes	Outdoor, Emergency	More than one place	No	Yes	Yes	No	No	No	Yes	36+	<=36	Dormitory	Dormitory	No	No	Yes	No	By walk	Walking	No	No	Yes	No	Yes	Yes	Yes	Yes	Yes	Yes	Yes	No	Yes	Yes	Strongly agree	Strongly agree
51	27	21 - 30	Male	Unmarried	Single	Physician	Physician	2	< = 4 years	Bachelor	Bachelor and above	6	Government	Yes	Outdoor	Outdoor	No	Yes	No	No	No	No	No	12 +	<=36	Dormitory	Dormitory	No	No	Yes	No	By walk	Walking	No	No	Yes	No	Yes	Yes	Yes	Yes	Yes	Yes	Yes	No	Yes	Yes	Strongly agree	Strongly agree
52	29	21 - 30	Male	Married	Married	Physician	Physician	4	< = 4 years	Bachelor	Bachelor and above	5	Government	Yes	Indoor, Outdoor, Emergency	More than one place	Yes	Yes	Yes	No	No	No	Yes	48 +	>36	Dormitory	Dormitory	No	No	Yes	No	By walk	Walking	No	No	Yes	No	Yes	Yes	Yes	Yes	Yes	Yes	Yes	No	No	Yes	Strongly agree	Strongly agree
53	44	41 - 50	Male	Married	Married	Physician	Physician	20	> 4 years	Fellow	Bachelor and above	3	Government	Yes	Indoor, Outdoor, Emergency	More than one place	Yes	Yes	Yes	No	No	No	Yes	48 +	>36	Home	Home	Yes	No	No	No	By walk	Walking	No	No	Yes	No	Yes	Yes	Yes	Yes	Yes	Yes	Yes	No	Yes	Yes	Strongly agree	Strongly agree
54	26	21 - 30	Male	Unmarried	Single	Physician	Physician	1	< = 4 years	Bachelor	Bachelor and above	3	Government	Yes	Indoor, Outdoor, Emergency	More than one place	Yes	Yes	Yes	No	No	No	Yes	48 +	>36	Dormitory	Dormitory	No	No	Yes	No	By walk	Walking	No	No	Yes	No	Yes	Yes	Yes	Yes	Yes	Yes	Yes	Yes	Yes	Yes	Strongly agree	Strongly agree
55	33	31 - 40	Male	Unmarried	Single	Physician	Physician	10	> 4 years	Bachelor	Bachelor and above	4	Government	Yes	Outdoor	Outdoor	No	Yes	No	No	No	No	No	36+	<=36	Home	Home	Yes	No	No	No	By private vehicle	private transport	No	No	No	Yes	Yes	Yes	Yes	Yes	Yes	Yes	Yes	No	Yes	Yes	Strongly agree	Agree
56	33	31 - 40	Male	Unmarried	Single	Physician	Physician	10	> 4 years	Bachelor	Bachelor and above	4	Government	Yes	Outdoor	Outdoor	No	Yes	No	No	No	No	No	36+	<=36	Home	Home	Yes	No	No	No	By private vehicle	private transport	No	No	No	Yes	Yes	Yes	Yes	Yes	Yes	Yes	Yes	No	Yes	Yes	Strongly agree	Agree
57	36	31 - 40	Female	Married	Married	Physician	Physician	11	> 4 years	Bachelor	Bachelor and above	6	Government	Yes	Indoor, Outdoor, ICU (Intensive Care Unit)	More than one place	Yes	Yes	No	No	No	Yes	Yes	48 +	>36	Hotel	Hotel	No	Yes	No	No	By private vehicle	private transport	No	No	No	Yes	Yes	Yes	Yes	Yes	Yes	Yes	Yes	No	No	Yes	Strongly agree	Strongly agree
58	35	31 - 40	Male	Married	Married	Physician	Physician	11	> 4 years	Fellow	Bachelor and above	4	Government	Yes	Indoor	Indoor	Yes	No	No	No	No	No	No	36+	<=36	Home	Home	Yes	No	No	No	By private vehicle	private transport	No	No	No	Yes	Yes	Yes	Yes	Yes	Yes	Yes	Yes	Yes	No	Yes	Agree	Agree
59	27	21 - 30	Female	Unmarried	Single	Physician	Physician	3	< = 4 years	Bachelor	Bachelor and above	2	Government	Yes	Emergency	Emergency	No	No	Yes	No	No	No	No	36+	<=36	Dormitory	Dormitory	No	No	Yes	No	By office transport	office transport	No	Yes	No	No	Yes	Yes	Yes	Yes	Yes	Yes	Yes	Yes	Yes	Yes	Strongly agree	Strongly agree
60	46	41 - 50	Male	Married	Married	Physician	Physician	2	< = 4 years	Masters	Bachelor and above	5	Government	Yes	Indoor, Outdoor	More than one place	Yes	Yes	No	No	No	No	Yes	24 +	<=36	Dormitory	Dormitory	No	No	Yes	No	By walk	Walking	No	No	Yes	No	Yes	Yes	Yes	Yes	Yes	Yes	Yes	Yes	Yes	Yes	Strongly agree	Strongly agree
61	29	21 - 30	Male	Unmarried	Single	Physician	Physician	4	< = 4 years	Bachelor	Bachelor and above	4	Government	Yes	Outdoor	Outdoor	No	Yes	No	No	No	No	No	36+	<=36	Home	Home	Yes	No	No	No	By private vehicle	private transport	No	No	No	Yes	Yes	Yes	Yes	Yes	Yes	Yes	Yes	Yes	No	Yes	Strongly agree	Strongly agree
62	33	31 - 40	Female	Married	Married	Physician	Physician	11	> 4 years	Masters	Bachelor and above	7	Private	Yes	CCU	Indoor	Yes	No	No	No	No	No	No	24 +	<=36	Home	Home	Yes	No	No	No	By private vehicle	private transport	No	No	No	Yes	Yes	Yes	Yes	Yes	Yes	Yes	Yes	No	Yes	Yes	Strongly agree	Strongly agree
63	33	31 - 40	Male	Married	Married	Physician	Physician	10	> 4 years	Bachelor	Bachelor and above	6	Government	Yes	Outdoor	Outdoor	No	Yes	No	No	No	No	No	36+	<=36	Home	Home	Yes	No	No	No	By private vehicle	private transport	No	No	No	Yes	Yes	Yes	Yes	Yes	Yes	Yes	Yes	Yes	Yes	Yes	Strongly agree	Strongly agree
64	27	21 - 30	Female	Unmarried	Single	Physician	Physician	3	< = 4 years	Bachelor	Bachelor and above	5	Private	Yes	Outdoor	Outdoor	No	Yes	No	No	No	No	No	24 +	<=36	Home	Home	Yes	No	No	No	By walk	Walking	No	No	Yes	No	Yes	Yes	Yes	Yes	Yes	Yes	Yes	No	Yes	Yes	Agree	Strongly agree
65	27	21 - 30	Female	Married	Married	Physician	Physician	6	> 4 years	Bachelor	Bachelor and above	4	Government	Yes	Indoor, Outdoor	More than one place	Yes	Yes	No	No	No	No	Yes	24 +	<=36	Dormitory	Dormitory	No	No	Yes	No	By walk	Walking	No	No	Yes	No	Yes	Yes	Yes	Yes	Yes	Yes	Yes	Yes	No	Yes	Strongly agree	Strongly agree
66	30	21 - 30	Male	Married	Married	Physician	Physician	6	> 4 years	Bachelor	Bachelor and above	4	Government	Yes	Indoor, Outdoor, Emergency	More than one place	Yes	Yes	Yes	No	No	No	Yes	48 +	>36	Dormitory	Dormitory	No	No	Yes	No	By walk	Walking	No	No	Yes	No	Yes	Yes	Yes	Yes	Yes	Yes	Yes	Yes	No	Yes	Strongly agree	Strongly agree
67	29	21 - 30	Male	Married	Married	Physician	Physician	5	> 4 years	Bachelor	Bachelor and above	2	Private	No	Indoor	Indoor	Yes	No	No	No	No	No	No	36+	<=36	Home	Home	Yes	No	No	No	By private vehicle	private transport	No	No	No	Yes	Yes	Yes	Yes	Yes	Yes	Yes	Yes	Yes	Yes	Yes	Strongly agree	Strongly agree
68	27	21 - 30	Female	Married	Married	Physician	Physician	3	< = 4 years	Bachelor	Bachelor and above	2	Private	Yes	Indoor, Outdoor	More than one place	Yes	Yes	No	No	No	No	Yes	48 +	>36	Home	Home	Yes	No	No	No	By private vehicle	private transport	No	No	No	Yes	Yes	Yes	Yes	Yes	Yes	Yes	Yes	Yes	Yes	Yes	Strongly agree	Strongly agree
69	29	21 - 30	Female	Married	Married	Physician	Physician	4	< = 4 years	Bachelor	Bachelor and above	5	Government	Yes	Indoor, Outdoor, Emergency	More than one place	Yes	Yes	Yes	No	No	No	Yes	48 +	>36	Hotel	Hotel	No	Yes	No	No	By office transport	office transport	No	Yes	No	No	Yes	Yes	Yes	Yes	Yes	Yes	Yes	No	Yes	Yes	Strongly agree	Strongly agree
70	31	31 - 40	Male	Married	Married	Physician	Physician	4	< = 4 years	Masters	Bachelor and above	6	Private	Yes	Indoor and outdoor both	More than one place	Yes	Yes	No	No	No	No	Yes	36+	<=36	Home	Home	Yes	No	No	No	By office transport	office transport	No	Yes	No	No	Yes	Yes	Yes	Yes	Yes	Yes	Yes	Yes	Yes	Yes	Strongly agree	Strongly agree
71	30	21 - 30	Male	Widowed	Single	Physician	Physician	6	> 4 years	Bachelor	Bachelor and above	5	Government	Yes	Indoor, Outdoor	More than one place	Yes	Yes	No	No	No	No	Yes	36+	<=36	Home	Home	Yes	No	No	No	By office transport	office transport	No	Yes	No	No	Yes	Yes	Yes	Yes	Yes	Yes	Yes	Yes	Yes	Yes	Neither agree nor disagree	Strongly agree
72	30	21 - 30	Female	Married	Married	Physician	Physician	5	> 4 years	Bachelor	Bachelor and above	2	Private	No	Emergency	Emergency	No	No	Yes	No	No	No	No	48 +	>36	Home	Home	Yes	No	No	No	By public transport	public transport	Yes	No	No	No	Yes	Yes	Yes	Yes	No	Yes	Yes	Yes	No	Yes	Strongly agree	Strongly agree
73	34	31 - 40	Male	Married	Married	Physician	Physician	10	> 4 years	Fellow	Bachelor and above	4	Government	Yes	Indoor	Indoor	Yes	No	No	No	No	No	No	24 +	<=36	Home	Home	Yes	No	No	No	By private vehicle	private transport	No	No	No	Yes	Yes	Yes	Yes	Yes	Yes	Yes	Yes	Yes	Yes	Yes	Strongly agree	Strongly agree
74	28	21 - 30	Male	Unmarried	Single	Physician	Physician	3	< = 4 years	Bachelor	Bachelor and above	4	Government	Yes	Outdoor	Outdoor	No	Yes	No	No	No	No	No	24 +	<=36	Home	Home	Yes	No	No	No	By private vehicle	private transport	No	No	No	Yes	Yes	Yes	Yes	Yes	Yes	Yes	Yes	Yes	Yes	Yes	Strongly agree	Agree
75	28	21 - 30	Male	Unmarried	Single	Physician	Physician	3	< = 4 years	Bachelor	Bachelor and above	#NULL!	Government	Yes	Outdoor	Outdoor	No	Yes	No	No	No	No	No	36+	<=36	Dormitory	Dormitory	No	No	Yes	No	By walk	Walking	No	No	Yes	No	Yes	Yes	Yes	Yes	Yes	Yes	Yes	No	Yes	Yes	Strongly agree	Strongly agree
76	28	21 - 30	Female	Unmarried	Single	Physician	Physician	2.5	< = 4 years	Bachelor	Bachelor and above	0	Private	No	Indoor, ICU (Intensive Care Unit)	More than one place	Yes	No	No	No	No	Yes	Yes	24 +	<=36	Hostel	Hostel	No	No	No	Yes	By public transport	public transport	Yes	No	No	No	Yes	Yes	Yes	Yes	Yes	Yes	Yes	Yes	Yes	Yes	Strongly agree	Agree
77	34	31 - 40	Female	Married	Married	Physician	Physician	10	> 4 years	Fellow	Bachelor and above	4	Government	Yes	Outdoor	Outdoor	No	Yes	No	No	No	No	No	36+	<=36	Home	Home	Yes	No	No	No	By private vehicle	private transport	No	No	No	Yes	Yes	Yes	Yes	Yes	Yes	Yes	Yes	No	Yes	Yes	Strongly agree	Strongly agree
78	25	21 - 30	Female	Unmarried	Single	Nurse	Non-physician	5	> 4 years	Diploma	Diploma	3	Government	Yes	Indoor	Indoor	Yes	No	No	No	No	No	No	48 +	>36	Hostel	Hostel	No	No	No	Yes	By walk	Walking	No	No	Yes	No	Yes	Yes	Yes	Yes	Yes	Yes	Yes	Yes	Yes	Yes	Agree	Agree
79	27	21 - 30	Female	Married	Married	Physician	Physician	1	< = 4 years	Bachelor	Bachelor and above	2	Government	Yes	Indoor	Indoor	Yes	No	No	No	No	No	No	24 +	<=36	Hospital	Hospital	No	No	No	No	By walk	Walking	No	No	Yes	No	Yes	Yes	Yes	Yes	Yes	Yes	Yes	No	No	Yes	Strongly agree	Strongly agree
80	26	21 - 30	Female	Unmarried	Single	Nurse	Non-physician	4	< = 4 years	Diploma	Diploma	4	Private	Yes	Indoor	Indoor	Yes	No	No	No	No	No	No	36+	<=36	Home	Home	Yes	No	No	No	By walk	Walking	No	No	Yes	No	Yes	Yes	Yes	Yes	Yes	Yes	Yes	No	Yes	Yes	Strongly agree	Strongly agree
81	25	21 - 30	Male	Unmarried	Single	Physician	Physician	1	< = 4 years	Bachelor	Bachelor and above	1	Government	Yes	Indoor	Indoor	Yes	No	No	No	No	No	No	48 +	>36	Home	Home	Yes	No	No	No	By walk	Walking	No	No	Yes	No	Yes	Yes	Yes	Yes	Yes	Yes	Yes	Yes	Yes	Yes	Strongly agree	Strongly agree
82	27	21 - 30	Male	Unmarried	Single	Physician	Physician	2	< = 4 years	Bachelor	Bachelor and above	1	Private	Yes	Indoor	Indoor	Yes	No	No	No	No	No	No	48 +	>36	Hotel	Hotel	No	Yes	No	No	By office transport	office transport	No	Yes	No	No	Yes	Yes	Yes	Yes	Yes	Yes	Yes	Yes	No	Yes	Strongly agree	Strongly agree
83	24	21 - 30	Male	Unmarried	Single	Nurse	Non-physician	3	< = 4 years	Diploma	Diploma	7	Private	Yes	Indoor	Indoor	Yes	No	No	No	No	No	No	48 +	>36	Home	Home	Yes	No	No	No	By walk	Walking	No	No	Yes	No	Yes	Yes	Yes	Yes	Yes	Yes	Yes	No	No	Yes	Strongly agree	Strongly agree
84	27	21 - 30	Female	Unmarried	Single	Physician	Physician	2	< = 4 years	Bachelor	Bachelor and above	20	Private	No	Indoor	Indoor	Yes	No	No	No	No	No	No	36+	<=36	Home	Home	Yes	No	No	No	By public transport	public transport	Yes	No	No	No	Yes	Yes	Yes	Yes	No	Yes	Yes	Yes	Yes	Yes	Strongly agree	Strongly agree
85	35	31 - 40	Male	Married	Married	Physician	Physician	6	> 4 years	Bachelor	Bachelor and above	2	Private	Yes	Indoor, Outdoor, Emergency	More than one place	Yes	Yes	Yes	No	No	No	Yes	48 +	>36	Home	Home	Yes	No	No	No	By office transport	office transport	No	Yes	No	No	Yes	Yes	Yes	Yes	Yes	Yes	Yes	Yes	No	Yes	Disagree	Strongly agree
86	33	31 - 40	Male	Married	Married	Physician	Physician	3.5	< = 4 years	Bachelor	Bachelor and above	2	Private	Yes	Indoor	Indoor	Yes	No	No	No	No	No	No	48 +	>36	Home	Home	Yes	No	No	No	By public transport	public transport	Yes	No	No	No	Yes	Yes	Yes	Yes	Yes	Yes	Yes	No	Yes	Yes	Strongly agree	Strongly agree
87	30	21 - 30	Male	Married	Married	Physician	Physician	7	> 4 years	Bachelor	Bachelor and above	#NULL!	Private	Yes	Emergency	Emergency	No	No	Yes	No	No	No	No	36+	<=36	Hostel	Hostel	No	No	No	Yes	By private vehicle	private transport	No	No	No	Yes	Yes	Yes	Yes	Yes	Yes	Yes	Yes	No	No	Yes	Strongly agree	Strongly agree
88	23	21 - 30	Female	Unmarried	Single	Physician	Physician	1	< = 4 years	Bachelor	Bachelor and above	1	Government	Yes	Indoor	Indoor	Yes	No	No	No	No	No	No	12 +	<=36	Hostel	Hostel	No	No	No	Yes	By walk	Walking	No	No	Yes	No	Yes	Yes	Yes	Yes	Yes	Yes	Yes	No	No	Yes	Strongly agree	Agree
89	23	21 - 30	Female	Unmarried	Single	Physician	Physician	1	< = 4 years	Bachelor	Bachelor and above	2	Government	Yes	Indoor	Indoor	Yes	No	No	No	No	No	No	60 +	>36	Hostel	Hostel	No	No	No	Yes	By walk	Walking	No	No	Yes	No	Yes	Yes	Yes	Yes	Yes	Yes	Yes	Yes	Yes	Yes	Strongly agree	Strongly agree
90	23	21 - 30	Female	Unmarried	Single	Physician	Physician	1	< = 4 years	Bachelor	Bachelor and above	5	Government	Yes	Indoor	Indoor	Yes	No	No	No	No	No	No	36+	<=36	Hostel	Hostel	No	No	No	Yes	By walk	Walking	No	No	Yes	No	Yes	Yes	Yes	Yes	Yes	Yes	Yes	Yes	No	Yes	Strongly agree	Strongly agree
91	40	31 - 40	Male	Married	Married	Physician	Physician	15	> 4 years	Bachelor	Bachelor and above	3	Private	Yes	Indoor	Indoor	Yes	No	No	No	No	No	No	24 +	<=36	Home	Home	Yes	No	No	No	By private vehicle	private transport	No	No	No	Yes	Yes	Yes	Yes	Yes	Yes	Yes	Yes	No	No	Yes	Strongly agree	Strongly agree
92	40	31 - 40	Female	Married	Married	Physician	Physician	15	> 4 years	Bachelor	Bachelor and above	3	Private	Yes	Indoor	Indoor	Yes	No	No	No	No	No	No	24 +	<=36	Home	Home	Yes	No	No	No	By private vehicle	private transport	No	No	No	Yes	Yes	Yes	Yes	Yes	Yes	Yes	Yes	Yes	Yes	Yes	Strongly agree	Strongly agree
93	30	21 - 30	Male	Unmarried	Single	Physician	Physician	4	< = 4 years	Bachelor	Bachelor and above	4	Government	Yes	Outdoor, Emergency	More than one place	No	Yes	Yes	No	No	No	Yes	24 +	<=36	Dormitory	Dormitory	No	No	Yes	No	By walk	Walking	No	No	Yes	No	Yes	Yes	Yes	Yes	Yes	Yes	Yes	No	Yes	Yes	Strongly agree	Strongly agree
94	28	21 - 30	Male	Married	Married	Physician	Physician	4	< = 4 years	Bachelor	Bachelor and above	7	Government	Yes	Indoor, Outdoor, Emergency	More than one place	Yes	Yes	Yes	No	No	No	Yes	36+	<=36	Dormitory	Dormitory	No	No	Yes	No	By walk	Walking	No	No	Yes	No	Yes	Yes	Yes	Yes	Yes	Yes	Yes	No	No	Yes	Strongly agree	Strongly agree
95	29	21 - 30	Male	Married	Married	Physician	Physician	3	< = 4 years	Bachelor	Bachelor and above	3	Government	Yes	Indoor, Outdoor, Emergency	More than one place	Yes	Yes	Yes	No	No	No	Yes	48 +	>36	Dormitory	Dormitory	No	No	Yes	No	By walk	Walking	No	No	Yes	No	Yes	Yes	Yes	Yes	Yes	Yes	Yes	No	Yes	Yes	Strongly agree	Strongly agree
96	27	21 - 30	Male	Unmarried	Single	Physician	Physician	5	> 4 years	Bachelor	Bachelor and above	3	Private	Yes	Outdoor	Outdoor	No	Yes	No	No	No	No	No	36+	<=36	Home	Home	Yes	No	No	No	By office transport	office transport	No	Yes	No	No	Yes	Yes	Yes	Yes	Yes	Yes	Yes	Yes	Yes	No	Strongly agree	Strongly agree
97	32	31 - 40	Male	Married	Married	Physician	Physician	5	> 4 years	Masters	Bachelor and above	2	Government	Yes	Indoor, ICU (Intensive Care Unit)	More than one place	Yes	No	No	No	No	Yes	Yes	24 +	<=36	Home	Home	Yes	No	No	No	By private vehicle	private transport	No	No	No	Yes	Yes	Yes	Yes	Yes	Yes	Yes	Yes	No	Yes	Yes	Strongly agree	Strongly agree
98	27	21 - 30	Male	Unmarried	Single	Physician	Physician	4	< = 4 years	Bachelor	Bachelor and above	4	Government	Yes	Indoor	Indoor	Yes	No	No	No	No	No	No	48 +	>36	Home	Home	Yes	No	No	No	By walk	Walking	No	No	Yes	No	Yes	Yes	Yes	Yes	Yes	Yes	Yes	No	Yes	Yes	Strongly agree	Strongly agree
99	24	21 - 30	Female	Unmarried	Single	Physician	Physician	1	< = 4 years	Bachelor	Bachelor and above	5	Government	Yes	Indoor	Indoor	Yes	No	No	No	No	No	No	36+	<=36	Hostel	Hostel	No	No	No	Yes	By walk	Walking	No	No	Yes	No	Yes	Yes	Yes	Yes	Yes	Yes	Yes	Yes	No	Yes	Strongly agree	Strongly agree
100	30	21 - 30	Male	Married	Married	Physician	Physician	4	< = 4 years	Bachelor	Bachelor and above	1	Government	Yes	Emergency	Emergency	No	No	Yes	No	No	No	No	36+	<=36	Home	Home	Yes	No	No	No	By walk	Walking	No	No	Yes	No	Yes	Yes	Yes	Yes	Yes	Yes	Yes	Yes	Yes	Yes	Strongly agree	Strongly agree
101	26	21 - 30	Male	Married	Married	Physician	Physician	1	< = 4 years	Bachelor	Bachelor and above	7	Private	Yes	Indoor	Indoor	Yes	No	No	No	No	No	No	12 +	<=36	Hospital	Hospital	No	No	No	No	By office transport	office transport	No	Yes	No	No	Yes	Yes	Yes	Yes	Yes	Yes	Yes	No	Yes	Yes	Strongly agree	Strongly agree
102	28	21 - 30	Male	Married	Married	Physician	Physician	3	< = 4 years	Bachelor	Bachelor and above	2	Private	Yes	Covid 19 isolation and Treatment centre	Indoor	Yes	No	No	No	No	No	No	48 +	>36	Dormitory	Dormitory	No	No	Yes	No	By office transport	office transport	No	Yes	No	No	Yes	Yes	Yes	Yes	Yes	No	Yes	No	Yes	No	Agree	Strongly agree
103	48	41 - 50	Male	Married	Married	Physician	Physician	20	> 4 years	Masters	Bachelor and above	3	Government	Yes	Indoor	Indoor	Yes	No	No	No	No	No	No	36+	<=36	Hospital	Hospital	No	No	No	No	By private vehicle	private transport	No	No	No	Yes	Yes	Yes	Yes	Yes	Yes	Yes	Yes	No	Yes	Yes	Strongly agree	Strongly agree
104	24	21 - 30	Female	Unmarried	Single	Physician	Physician	0	< = 4 years	Bachelor	Bachelor and above	1	Government	No	Indoor	Indoor	Yes	No	No	No	No	No	No	24 +	<=36	Hostel	Hostel	No	No	No	Yes	By walk	Walking	No	No	Yes	No	Yes	Yes	Yes	Yes	Yes	Yes	Yes	No	No	Yes	Agree	Strongly agree
105	33	31 - 40	Male	Married	Married	Physician	Physician	8	> 4 years	Bachelor	Bachelor and above	4	Government	No	Indoor	Indoor	Yes	No	No	No	No	No	No	48 +	>36	Hotel	Hotel	No	Yes	No	No	By office transport	office transport	No	Yes	No	No	Yes	Yes	Yes	Yes	No	Yes	Yes	Yes	Yes	Yes	Agree	Agree
106	30	21 - 30	Male	Married	Married	Physician	Physician	5	> 4 years	Bachelor	Bachelor and above	5	Private	No	Outdoor	Outdoor	No	Yes	No	No	No	No	No	24 +	<=36	Home	Home	Yes	No	No	No	By private vehicle	private transport	No	No	No	Yes	Yes	Yes	Yes	Yes	Yes	Yes	Yes	No	No	Yes	Strongly agree	Agree
107	27	21 - 30	Female	Unmarried	Single	Physician	Physician	1	< = 4 years	Bachelor	Bachelor and above	4	Government	Yes	Indoor	Indoor	Yes	No	No	No	No	No	No	48 +	>36	Hotel	Hotel	No	Yes	No	No	By office transport	office transport	No	Yes	No	No	Yes	Yes	Yes	Yes	Yes	Yes	Yes	Yes	Yes	Yes	Disagree	Strongly disagree
108	32	31 - 40	Male	Married	Married	Nurse	Non-physician	14	> 4 years	Diploma	Diploma	4	Private	No	Indoor, Outdoor, Emergency, ICU (Intensive Care Unit)	More than one place	Yes	Yes	Yes	No	No	Yes	Yes	60 +	>36	Hospital	Hospital	No	No	No	No	By public transport	public transport	Yes	No	No	No	Yes	Yes	Yes	Yes	Yes	Yes	Yes	Yes	Yes	Yes	Strongly agree	Strongly agree
109	26	21 - 30	Female	Unmarried	Single	Physician	Physician	1	< = 4 years	Bachelor	Bachelor and above	1	Government	No	Indoor	Indoor	Yes	No	No	No	No	No	No	48 +	>36	Hostel	Hostel	No	No	No	Yes	By walk	Walking	No	No	Yes	No	Yes	Yes	Yes	Yes	Yes	Yes	Yes	Yes	Yes	Yes	Agree	Agree
110	30	21 - 30	Female	Married	Married	Physician	Physician	5	> 4 years	Masters	Bachelor and above	4	Government	No	Indoor	Indoor	Yes	No	No	No	No	No	No	24 +	<=36	Home	Home	Yes	No	No	No	By public transport	public transport	Yes	No	No	No	Yes	Yes	Yes	Yes	Yes	Yes	Yes	No	No	No	Strongly disagree	Agree
111	32	31 - 40	Male	Married	Married	Physician	Physician	#NULL!	#NULL!	Bachelor	Bachelor and above	#NULL!	Government	Yes	Indoor	Indoor	Yes	No	No	No	No	No	No	36+	<=36	Hotel	Hotel	No	Yes	No	No	By office transport	office transport	No	Yes	No	No	Yes	Yes	No	Yes	Yes	Yes	Yes	Yes	No	Yes	Strongly agree	Strongly agree
112	33	31 - 40	Male	Married	Married	Physician	Physician	8	> 4 years	Fellow	Bachelor and above	8	Private	No	Outdoor	Outdoor	No	Yes	No	No	No	No	No	24 +	<=36	Home	Home	Yes	No	No	No	By private vehicle	private transport	No	No	No	Yes	Yes	Yes	Yes	Yes	Yes	Yes	Yes	Yes	Yes	Yes	Strongly agree	Strongly agree
113	35	31 - 40	Male	Married	Married	Laboratory Technician	Non-physician	10	> 4 years	Diploma	Diploma	4	Government	Yes	Laboratory	Laboratory	No	No	No	No	Yes	No	No	48 +	>36	Home	Home	Yes	No	No	No	By walk	Walking	No	No	Yes	No	Yes	Yes	Yes	Yes	Yes	Yes	Yes	Yes	Yes	Yes	Neither agree nor disagree	Strongly agree
114	30	21 - 30	Male	Married	Married	Physician	Physician	4	< = 4 years	Bachelor	Bachelor and above	3	Government	Yes	Indoor	Indoor	Yes	No	No	No	No	No	No	48 +	>36	Hospital	Hospital	No	No	No	No	By office transport	office transport	No	Yes	No	No	Yes	Yes	Yes	Yes	Yes	Yes	Yes	No	No	Yes	Strongly agree	Strongly agree
115	60	51 - 60	Male	Married	Married	Physician	Physician	35	> 4 years	Masters	Bachelor and above	5	Government	Yes	Anesthesiology private practice	Indoor	Yes	No	No	No	No	No	No	12 +	<=36	Hospital	Hospital	No	No	No	No	By office transport	office transport	No	Yes	No	No	Yes	Yes	Yes	Yes	No	Yes	Yes	No	No	Yes	Strongly agree	Strongly agree
116	28	21 - 30	Female	Married	Married	Pharmacist	Non-physician	4	< = 4 years	Masters	Bachelor and above	5	Private	Yes	Pharmacy	Pharmacy	No	No	No	Yes	No	No	No	48 +	>36	Home	Home	Yes	No	No	No	By office transport	office transport	No	Yes	No	No	Yes	Yes	Yes	Yes	No	Yes	Yes	No	Yes	Yes	Strongly agree	Strongly agree
117	29	21 - 30	Male	Married	Married	Physician	Physician	5	> 4 years	Bachelor	Bachelor and above	3	Government	Yes	Indoor	Indoor	Yes	No	No	No	No	No	No	48 +	>36	Hospital	Hospital	No	No	No	No	By office transport	office transport	No	Yes	No	No	Yes	Yes	Yes	Yes	Yes	Yes	Yes	No	Yes	Yes	Strongly agree	Strongly agree
118	29	21 - 30	Female	Married	Married	Physician	Physician	3	< = 4 years	Bachelor	Bachelor and above	2	Private	Yes	Indoor	Indoor	Yes	No	No	No	No	No	No	24 +	<=36	Home	Home	Yes	No	No	No	By public transport	public transport	Yes	No	No	No	Yes	Yes	Yes	Yes	Yes	Yes	Yes	Yes	Yes	Yes	Strongly agree	Strongly agree
119	41	41 - 50	Male	Married	Married	Laboratory Technician	Non-physician	19	> 4 years	Diploma	Diploma	14	Government	Yes	Laboratory	Laboratory	No	No	No	No	Yes	No	No	48 +	>36	Home	Home	Yes	No	No	No	By walk	Walking	No	No	Yes	No	Yes	Yes	Yes	Yes	Yes	Yes	Yes	Yes	Yes	Yes	Strongly disagree	Strongly agree
120	30	21 - 30	Female	Married	Married	Nurse	Non-physician	10	> 4 years	Diploma	Diploma	4	Government	No	Outdoor	Outdoor	No	Yes	No	No	No	No	No	36+	<=36	Hostel	Hostel	No	No	No	Yes	By walk	Walking	No	No	Yes	No	Yes	Yes	Yes	Yes	Yes	Yes	Yes	Yes	Yes	Yes	Agree	Strongly agree
121	31	31 - 40	Male	Unmarried	Single	Physician	Physician	7	> 4 years	Bachelor	Bachelor and above	4	Government	Yes	Emergency	Emergency	No	No	Yes	No	No	No	No	48 +	>36	Home	Home	Yes	No	No	No	By public transport	public transport	Yes	No	No	No	Yes	Yes	Yes	Yes	Yes	Yes	Yes	No	Yes	Yes	Disagree	Disagree
122	31	31 - 40	Male	Unmarried	Single	Physician	Physician	7	> 4 years	Bachelor	Bachelor and above	4	Government	Yes	Emergency	Emergency	No	No	Yes	No	No	No	No	48 +	>36	Home	Home	Yes	No	No	No	By public transport	public transport	Yes	No	No	No	Yes	Yes	Yes	Yes	Yes	Yes	Yes	No	Yes	Yes	Disagree	Disagree
123	29	21 - 30	Male	Married	Married	Physician	Physician	1	< = 4 years	Bachelor	Bachelor and above	2	Government	Yes	Indoor	Indoor	Yes	No	No	No	No	No	No	48 +	>36	Hotel	Hotel	No	Yes	No	No	By office transport	office transport	No	Yes	No	No	Yes	Yes	Yes	Yes	Yes	Yes	Yes	No	Yes	Yes	Strongly agree	Strongly agree
124	30	21 - 30	Female	Unmarried	Single	Physician	Physician	6	> 4 years	Bachelor	Bachelor and above	3	Government	Yes	Indoor, Outdoor, Emergency	More than one place	Yes	Yes	Yes	No	No	No	Yes	24 +	<=36	Dormitory	Dormitory	No	No	Yes	No	By walk	Walking	No	No	Yes	No	Yes	Yes	Yes	Yes	Yes	Yes	Yes	Yes	Yes	Yes	Agree	Strongly agree
125	31	31 - 40	Female	Unmarried	Single	Physician	Physician	7	> 4 years	Bachelor	Bachelor and above	1	Government	Yes	Outdoor, Emergency	More than one place	No	Yes	Yes	No	No	No	Yes	24 +	<=36	Dormitory	Dormitory	No	No	Yes	No	By walk	Walking	No	No	Yes	No	Yes	Yes	Yes	Yes	Yes	Yes	Yes	No	Yes	Yes	Strongly agree	Strongly agree
126	27	21 - 30	Female	Married	Married	Physician	Physician	2	< = 4 years	Bachelor	Bachelor and above	3	Government	Yes	Emergency	Emergency	No	No	Yes	No	No	No	No	36+	<=36	Dormitory	Dormitory	No	No	Yes	No	By walk	Walking	No	No	Yes	No	Yes	No	Yes	Yes	No	Yes	Yes	Yes	Yes	Yes	Strongly agree	Strongly agree
127	30	21 - 30	Female	Married	Married	Physician	Physician	5	> 4 years	Bachelor	Bachelor and above	2	Government	Yes	Outdoor	Outdoor	No	Yes	No	No	No	No	No	48 +	>36	Dormitory	Dormitory	No	No	Yes	No	By walk	Walking	No	No	Yes	No	Yes	Yes	Yes	Yes	Yes	Yes	Yes	Yes	Yes	Yes	Strongly agree	Strongly agree
128	30	21 - 30	Male	Married	Married	Physician	Physician	5	> 4 years	Bachelor	Bachelor and above	8	Private	Yes	Indoor	Indoor	Yes	No	No	No	No	No	No	48 +	>36	Home	Home	Yes	No	No	No	By private vehicle	private transport	No	No	No	Yes	Yes	Yes	Yes	Yes	No	Yes	Yes	No	Yes	Yes	Strongly agree	Strongly agree
129	28	21 - 30	Female	Married	Married	Physician	Physician	3	< = 4 years	Bachelor	Bachelor and above	5	Private	Yes	Emergency	Emergency	No	No	Yes	No	No	No	No	48 +	>36	Hospital	Hospital	No	No	No	No	By public transport	public transport	Yes	No	No	No	Yes	Yes	Yes	Yes	Yes	No	Yes	No	Yes	Yes	Disagree	Neither agree nor disagree
130	30	21 - 30	Male	Married	Married	Physician	Physician	2	< = 4 years	Bachelor	Bachelor and above	5	Government	Yes	Indoor, Outdoor, Emergency	More than one place	Yes	Yes	Yes	No	No	No	Yes	48 +	>36	Dormitory	Dormitory	No	No	Yes	No	By walk	Walking	No	No	Yes	No	Yes	Yes	Yes	Yes	Yes	Yes	Yes	Yes	Yes	Yes	Strongly agree	Strongly agree
131	28	21 - 30	Male	Unmarried	Single	Physician	Physician	1	< = 4 years	Masters	Bachelor and above	4	Government	Yes	Indoor	Indoor	Yes	No	No	No	No	No	No	36+	<=36	Hostel	Hostel	No	No	No	Yes	By walk	Walking	No	No	Yes	No	Yes	Yes	Yes	Yes	Yes	Yes	Yes	Yes	Yes	Yes	Strongly agree	Strongly agree
132	27	21 - 30	Female	Married	Married	Physician	Physician	3	< = 4 years	Bachelor	Bachelor and above	4	Government	Yes	Outdoor	Outdoor	No	Yes	No	No	No	No	No	48 +	>36	Home	Home	Yes	No	No	No	By public transport	public transport	Yes	No	No	No	Yes	Yes	Yes	Yes	No	Yes	Yes	Yes	No	Yes	Strongly agree	Strongly agree
133	30	21 - 30	Male	Married	Married	Physician	Physician	5	> 4 years	Bachelor	Bachelor and above	5	Government	Yes	Indoor	Indoor	Yes	No	No	No	No	No	No	72 +	>36	Hotel	Hotel	No	Yes	No	No	By office transport	office transport	No	Yes	No	No	Yes	Yes	Yes	Yes	Yes	No	Yes	No	Yes	Yes	Strongly agree	Strongly agree
134	30	21 - 30	Male	Unmarried	Single	Physician	Physician	5	> 4 years	Bachelor	Bachelor and above	4	Government	Yes	Indoor, Outdoor, Emergency	More than one place	Yes	Yes	Yes	No	No	No	Yes	24 +	<=36	Dormitory	Dormitory	No	No	Yes	No	By walk	Walking	No	No	Yes	No	Yes	Yes	Yes	Yes	Yes	Yes	Yes	Yes	Yes	Yes	Strongly disagree	Strongly agree
135	25	21 - 30	Male	Unmarried	Single	Physician	Physician	0	< = 4 years	Bachelor	Bachelor and above	4	Government	Yes	Indoor	Indoor	Yes	No	No	No	No	No	No	48 +	>36	Hostel	Hostel	No	No	No	Yes	By walk	Walking	No	No	Yes	No	Yes	Yes	Yes	Yes	Yes	Yes	Yes	Yes	Yes	Yes	Agree	Agree
136	25	21 - 30	Female	Unmarried	Single	Physician	Physician	0	< = 4 years	Bachelor	Bachelor and above	4	Government	No	Indoor	Indoor	Yes	No	No	No	No	No	No	48 +	>36	Hostel	Hostel	No	No	No	Yes	By walk	Walking	No	No	Yes	No	Yes	Yes	Yes	Yes	No	Yes	Yes	Yes	Yes	Yes	Strongly agree	Strongly agree
137	29	21 - 30	Male	Unmarried	Single	Physician	Physician	4	< = 4 years	Bachelor	Bachelor and above	5	Private	Yes	Indoor, Outdoor, Emergency	More than one place	Yes	Yes	Yes	No	No	No	Yes	24 +	<=36	Home	Home	Yes	No	No	No	By office transport	office transport	No	Yes	No	No	Yes	Yes	Yes	Yes	Yes	Yes	Yes	Yes	Yes	Yes	Strongly disagree	Strongly agree
138	30	21 - 30	Male	Married	Married	Physician	Physician	5	> 4 years	Bachelor	Bachelor and above	5	Government	Yes	Indoor, Outdoor, Emergency	More than one place	Yes	Yes	Yes	No	No	No	Yes	48 +	>36	Dormitory	Dormitory	No	No	Yes	No	By walk	Walking	No	No	Yes	No	Yes	Yes	Yes	Yes	Yes	Yes	Yes	Yes	Yes	Yes	Strongly agree	Strongly agree
139	32	31 - 40	Female	Married	Married	Nurse	Non-physician	10	> 4 years	Diploma	Diploma	4	Government	No	Indoor	Indoor	Yes	No	No	No	No	No	No	48 +	>36	Hotel	Hotel	No	Yes	No	No	By public transport	public transport	Yes	No	No	No	Yes	Yes	Yes	Yes	Yes	Yes	Yes	Yes	No	Yes	Strongly agree	Strongly agree
140	32	31 - 40	Male	Married	Married	Physician	Physician	8	> 4 years	Bachelor	Bachelor and above	1	Government	Yes	Indoor	Indoor	Yes	No	No	No	No	No	No	36+	<=36	Hospital	Hospital	No	No	No	No	By office transport	office transport	No	Yes	No	No	Yes	Yes	Yes	Yes	Yes	Yes	Yes	No	Yes	Yes	Strongly agree	Strongly agree
141	30	21 - 30	Male	Married	Married	Physician	Physician	5	> 4 years	Bachelor	Bachelor and above	4	Government	Yes	Indoor	Indoor	Yes	No	No	No	No	No	No	60 +	>36	Hospital	Hospital	No	No	No	No	By office transport	office transport	No	Yes	No	No	Yes	Yes	Yes	Yes	Yes	Yes	Yes	Yes	Yes	Yes	Strongly agree	Strongly agree
142	26	21 - 30	Female	Unmarried	Single	Nurse	Non-physician	3	< = 4 years	Diploma	Diploma	5	Government	No	Indoor	Indoor	Yes	No	No	No	No	No	No	36+	<=36	Hostel	Hostel	No	No	No	Yes	By walk	Walking	No	No	Yes	No	Yes	Yes	Yes	Yes	Yes	Yes	Yes	Yes	Yes	Yes	Agree	Strongly agree
143	28	21 - 30	Female	Unmarried	Single	Nurse	Non-physician	3.5	< = 4 years	Bachelor	Bachelor and above	4	Government	Yes	Indoor	Indoor	Yes	No	No	No	No	No	No	48 +	>36	Hostel	Hostel	No	No	No	Yes	By walk	Walking	No	No	Yes	No	Yes	Yes	Yes	Yes	Yes	Yes	Yes	Yes	Yes	Yes	Agree	Strongly agree
144	26	21 - 30	Male	Unmarried	Single	Physician	Physician	2	< = 4 years	Masters	Bachelor and above	5	Government	No	Outdoor	Outdoor	No	Yes	No	No	No	No	No	36+	<=36	Home	Home	Yes	No	No	No	By private vehicle	private transport	No	No	No	Yes	Yes	Yes	Yes	Yes	Yes	Yes	Yes	No	Yes	Yes	Strongly agree	Agree
145	25	21 - 30	Female	Unmarried	Single	Nurse	Non-physician	3	< = 4 years	Diploma	Diploma	6	Government	No	Indoor	Indoor	Yes	No	No	No	No	No	No	48 +	>36	Hostel	Hostel	No	No	No	Yes	By walk	Walking	No	No	Yes	No	Yes	Yes	Yes	Yes	No	Yes	Yes	Yes	Yes	Yes	Agree	Strongly agree
146	28	21 - 30	Female	Married	Married	Nurse	Non-physician	4.5	> 4 years	Bachelor	Bachelor and above	2	Government	Yes	Outdoor, Emergency	More than one place	No	Yes	Yes	No	No	No	Yes	36+	<=36	Home	Home	Yes	No	No	No	By public transport	public transport	Yes	No	No	No	Yes	Yes	Yes	Yes	Yes	Yes	Yes	Yes	Yes	Yes	Agree	Strongly agree
147	28	21 - 30	Female	Unmarried	Single	Nurse	Non-physician	6	> 4 years	Bachelor	Bachelor and above	6	Government	No	Indoor	Indoor	Yes	No	No	No	No	No	No	48 +	>36	Hostel	Hostel	No	No	No	Yes	By walk	Walking	No	No	Yes	No	Yes	Yes	Yes	Yes	Yes	Yes	Yes	Yes	Yes	Yes	Agree	Agree
148	28	21 - 30	Female	Married	Married	Physician	Physician	2	< = 4 years	Bachelor	Bachelor and above	2	Private	Yes	Indoor	Indoor	Yes	No	No	No	No	No	No	48 +	>36	Home	Home	Yes	No	No	No	By private vehicle	private transport	No	No	No	Yes	Yes	Yes	Yes	Yes	Yes	Yes	Yes	Yes	Yes	Yes	Strongly agree	Strongly agree
149	39	31 - 40	Male	Married	Married	Physician	Physician	10	> 4 years	Bachelor	Bachelor and above	5	Government	Yes	Indoor, Outdoor	More than one place	Yes	Yes	No	No	No	No	Yes	24 +	<=36	Home	Home	Yes	No	No	No	By public transport	public transport	Yes	No	No	No	Yes	Yes	Yes	Yes	No	Yes	Yes	No	Yes	Yes	Strongly agree	Strongly agree
150	34	31 - 40	Female	Married	Married	Physician	Physician	4	< = 4 years	Bachelor	Bachelor and above	4	Private	Yes	Outdoor	Outdoor	No	Yes	No	No	No	No	No	48 +	>36	Home	Home	Yes	No	No	No	By public transport	public transport	Yes	No	No	No	Yes	Yes	Yes	Yes	No	Yes	Yes	Yes	Yes	No	Neither agree nor disagree	Neither agree nor disagree
151	36	31 - 40	Male	Married	Married	Physician	Physician	14	> 4 years	Fellow	Bachelor and above	6	Government	Yes	Indoor	Indoor	Yes	No	No	No	No	No	No	36+	<=36	Home	Home	Yes	No	No	No	By private vehicle	private transport	No	No	No	Yes	Yes	Yes	Yes	Yes	Yes	Yes	Yes	Yes	Yes	Yes	Strongly agree	Strongly agree
152	27	21 - 30	Female	Unmarried	Single	Physician	Physician	2	< = 4 years	Bachelor	Bachelor and above	4	Private	Yes	Emergency	Emergency	No	No	Yes	No	No	No	No	24 +	<=36	Home	Home	Yes	No	No	No	By office transport	office transport	No	Yes	No	No	Yes	Yes	Yes	Yes	Yes	Yes	Yes	Yes	No	Yes	Strongly agree	Strongly agree
153	27	21 - 30	Male	Unmarried	Single	Physician	Physician	2	< = 4 years	Bachelor	Bachelor and above	5	Private	Yes	Indoor	Indoor	Yes	No	No	No	No	No	No	24 +	<=36	Home	Home	Yes	No	No	No	By office transport	office transport	No	Yes	No	No	Yes	Yes	Yes	Yes	Yes	Yes	Yes	Yes	Yes	Yes	Strongly agree	Strongly agree
154	28	21 - 30	Female	Married	Married	Physician	Physician	3	< = 4 years	Bachelor	Bachelor and above	2	Private	Yes	Emergency	Emergency	No	No	Yes	No	No	No	No	24 +	<=36	Home	Home	Yes	No	No	No	By office transport	office transport	No	Yes	No	No	Yes	Yes	Yes	Yes	Yes	Yes	Yes	Yes	Yes	Yes	Agree	Strongly agree
155	27	21 - 30	Male	Unmarried	Single	Physician	Physician	1.5	< = 4 years	Bachelor	Bachelor and above	6	Private	Yes	Indoor	Indoor	Yes	No	No	No	No	No	No	24 +	<=36	Home	Home	Yes	No	No	No	By office transport	office transport	No	Yes	No	No	Yes	Yes	Yes	Yes	Yes	Yes	Yes	Yes	Yes	Yes	Strongly agree	Strongly agree
156	27	21 - 30	Male	Unmarried	Single	Physician	Physician	2	< = 4 years	Bachelor	Bachelor and above	4	Private	Yes	Indoor	Indoor	Yes	No	No	No	No	No	No	24 +	<=36	Home	Home	Yes	No	No	No	By office transport	office transport	No	Yes	No	No	Yes	Yes	Yes	Yes	Yes	Yes	Yes	No	Yes	Yes	Strongly agree	Strongly agree
157	29	21 - 30	Female	Married	Married	Physician	Physician	3.5	< = 4 years	Bachelor	Bachelor and above	2	Private	Yes	Emergency	Emergency	No	No	Yes	No	No	No	No	24 +	<=36	Home	Home	Yes	No	No	No	By office transport	office transport	No	Yes	No	No	Yes	Yes	Yes	Yes	Yes	Yes	Yes	Yes	Yes	Yes	Strongly agree	Strongly agree
158	28	21 - 30	Male	Unmarried	Single	Physician	Physician	5	> 4 years	Bachelor	Bachelor and above	4	Private	Yes	Indoor	Indoor	Yes	No	No	No	No	No	No	48 +	>36	Home	Home	Yes	No	No	No	By public transport	public transport	Yes	No	No	No	Yes	Yes	Yes	Yes	Yes	Yes	Yes	Yes	No	Yes	Strongly agree	Strongly agree
159	29	21 - 30	Female	Married	Married	Physician	Physician	5	> 4 years	Bachelor	Bachelor and above	5	Government	Yes	Emergency	Emergency	No	No	Yes	No	No	No	No	36+	<=36	Dormitory	Dormitory	No	No	Yes	No	By walk	Walking	No	No	Yes	No	Yes	Yes	Yes	Yes	Yes	Yes	Yes	Yes	No	Yes	Strongly agree	Strongly agree
160	30	21 - 30	Male	Unmarried	Single	Physician	Physician	5	> 4 years	Bachelor	Bachelor and above	10	Government	Yes	Indoor	Indoor	Yes	No	No	No	No	No	No	60 +	>36	Hotel	Hotel	No	Yes	No	No	By private vehicle	private transport	No	No	No	Yes	Yes	Yes	Yes	Yes	Yes	Yes	Yes	Yes	No	Yes	Strongly agree	Strongly agree
161	30	21 - 30	Male	Married	Married	Physician	Physician	6	> 4 years	Bachelor	Bachelor and above	6	Government	No	Indoor, Outdoor, Emergency	More than one place	Yes	Yes	Yes	No	No	No	Yes	48 +	>36	Dormitory	Dormitory	No	No	Yes	No	By public transport	public transport	Yes	No	No	No	Yes	Yes	Yes	Yes	Yes	Yes	Yes	Yes	No	Yes	Strongly agree	Strongly agree
162	30	21 - 30	Female	Married	Married	Physician	Physician	6	> 4 years	Bachelor	Bachelor and above	6	Government	No	Indoor, Outdoor, Emergency	More than one place	Yes	Yes	Yes	No	No	No	Yes	48 +	>36	Dormitory	Dormitory	No	No	Yes	No	By public transport	public transport	Yes	No	No	No	Yes	Yes	Yes	Yes	Yes	Yes	Yes	No	Yes	Yes	Strongly agree	Strongly agree
163	27	21 - 30	Female	Unmarried	Single	Nurse	Non-physician	4	< = 4 years	Diploma	Diploma	7	Government	No	Indoor	Indoor	Yes	No	No	No	No	No	No	36+	<=36	Hostel	Hostel	No	No	No	Yes	By walk	Walking	No	No	Yes	No	Yes	Yes	Yes	Yes	No	Yes	No	Yes	Yes	Yes	Agree	Strongly agree
164	25	21 - 30	Female	Unmarried	Single	Nurse	Non-physician	3	< = 4 years	Diploma	Diploma	5	Government	No	Indoor	Indoor	Yes	No	No	No	No	No	No	36+	<=36	Hostel	Hostel	No	No	No	Yes	By walk	Walking	No	No	Yes	No	Yes	Yes	Yes	Yes	No	Yes	Yes	Yes	Yes	Yes	Agree	Agree
165	26	21 - 30	Male	Married	Married	Nurse	Non-physician	7	> 4 years	Diploma	Diploma	3	Government	Yes	Indoor	Indoor	Yes	No	No	No	No	No	No	36+	<=36	Home	Home	Yes	No	No	No	By public transport	public transport	Yes	No	No	No	Yes	Yes	Yes	Yes	Yes	Yes	Yes	Yes	Yes	Yes	Strongly agree	Strongly agree
166	30	21 - 30	Male	Married	Married	Physician	Physician	5.5	> 4 years	Bachelor	Bachelor and above	2	Government	Yes	Indoor, Outdoor	More than one place	Yes	Yes	No	No	No	No	Yes	36+	<=36	Dormitory	Dormitory	No	No	Yes	No	By walk	Walking	No	No	Yes	No	Yes	Yes	Yes	Yes	Yes	Yes	Yes	Yes	Yes	Yes	Strongly agree	Strongly agree
167	29	21 - 30	Female	Married	Married	Physician	Physician	5.5	> 4 years	Bachelor	Bachelor and above	2	Government	Yes	Outdoor, Emergency	More than one place	No	Yes	Yes	No	No	No	Yes	36+	<=36	Dormitory	Dormitory	No	No	Yes	No	By walk	Walking	No	No	Yes	No	Yes	Yes	Yes	Yes	Yes	Yes	Yes	Yes	Yes	Yes	Strongly agree	Strongly agree
168	31	31 - 40	Female	Married	Married	Physician	Physician	6	> 4 years	Bachelor	Bachelor and above	5	Private	No	Indoor	Indoor	Yes	No	No	No	No	No	No	48 +	>36	Dormitory	Dormitory	No	No	Yes	No	By office transport	office transport	No	Yes	No	No	Yes	Yes	Yes	Yes	Yes	Yes	Yes	No	Yes	Yes	Strongly agree	Strongly agree
169	29	21 - 30	Male	Unmarried	Single	Physician	Physician	5	> 4 years	Bachelor	Bachelor and above	4	Private	Yes	Indoor, Outdoor, Emergency	More than one place	Yes	Yes	Yes	No	No	No	Yes	48 +	>36	Home	Home	Yes	No	No	No	By public transport	public transport	Yes	No	No	No	Yes	Yes	Yes	Yes	Yes	Yes	Yes	Yes	Yes	Yes	Strongly agree	Strongly agree
170	35	31 - 40	Male	Married	Married	Physician	Physician	10	> 4 years	Masters	Bachelor and above	4	Private	Yes	Indoor, Emergency	More than one place	Yes	No	Yes	No	No	No	Yes	24 +	<=36	Home	Home	Yes	No	No	No	By private vehicle	private transport	No	No	No	Yes	Yes	Yes	Yes	Yes	Yes	Yes	Yes	Yes	Yes	Yes	Strongly agree	Strongly agree
171	30	21 - 30	Female	Married	Married	Physician	Physician	5.5	> 4 years	Bachelor	Bachelor and above	2	Government	Yes	Outdoor, Emergency	More than one place	No	Yes	Yes	No	No	No	Yes	36+	<=36	Dormitory	Dormitory	No	No	Yes	No	By walk	Walking	No	No	Yes	No	Yes	Yes	Yes	Yes	Yes	Yes	Yes	Yes	Yes	Yes	Strongly agree	Strongly agree
172	30	21 - 30	Male	Unmarried	Single	Physician	Physician	5	> 4 years	Bachelor	Bachelor and above	4	Government	No	Indoor, Outdoor, Emergency	More than one place	Yes	Yes	Yes	No	No	No	Yes	36+	<=36	Dormitory	Dormitory	No	No	Yes	No	By walk	Walking	No	No	Yes	No	Yes	Yes	Yes	Yes	Yes	Yes	Yes	Yes	Yes	Yes	Strongly agree	Strongly agree
173	25	21 - 30	Female	Unmarried	Single	Physician	Physician	0.25	< = 4 years	Bachelor	Bachelor and above	5	Government	Yes	Indoor	Indoor	Yes	No	No	No	No	No	No	48 +	>36	Hostel	Hostel	No	No	No	Yes	By walk	Walking	No	No	Yes	No	Yes	Yes	Yes	Yes	No	Yes	Yes	Yes	Yes	Yes	Agree	Agree
174	32	31 - 40	Male	Married	Married	Physician	Physician	5	> 4 years	Bachelor	Bachelor and above	3	Government	No	Indoor	Indoor	Yes	No	No	No	No	No	No	24 +	<=36	Home	Home	Yes	No	No	No	By private vehicle	private transport	No	No	No	Yes	Yes	Yes	Yes	Yes	Yes	Yes	Yes	No	Yes	Yes	Strongly agree	Strongly agree
175	30	21 - 30	Female	Married	Married	Physician	Physician	6	> 4 years	Bachelor	Bachelor and above	7	Government	Yes	Indoor	Indoor	Yes	No	No	No	No	No	No	24 +	<=36	Home	Home	Yes	No	No	No	By private vehicle	private transport	No	No	No	Yes	Yes	Yes	Yes	Yes	Yes	Yes	Yes	No	Yes	Yes	Strongly agree	Strongly agree
176	30	21 - 30	Male	Married	Married	Physician	Physician	5	> 4 years	Bachelor	Bachelor and above	4	Government	Yes	Isolation center	Indoor	Yes	No	No	No	No	No	No	48 +	>36	Home	Home	Yes	No	No	No	By office transport	office transport	No	Yes	No	No	Yes	Yes	Yes	Yes	Yes	Yes	Yes	No	No	Yes	Strongly agree	Strongly agree
177	29	21 - 30	Male	Married	Married	Physician	Physician	4	< = 4 years	Bachelor	Bachelor and above	6	Government	No	Indoor, Outdoor, Emergency	More than one place	Yes	Yes	Yes	No	No	No	Yes	36+	<=36	Home	Home	Yes	No	No	No	By private vehicle	private transport	No	No	No	Yes	Yes	Yes	Yes	Yes	No	Yes	Yes	No	No	Yes	Strongly agree	Strongly agree
178	27	21 - 30	Female	Unmarried	Single	Physician	Physician	1	< = 4 years	Bachelor	Bachelor and above	7	Private	Yes	Indoor	Indoor	Yes	No	No	No	No	No	No	48 +	>36	Dormitory	Dormitory	No	No	Yes	No	By office transport	office transport	No	Yes	No	No	Yes	Yes	Yes	Yes	Yes	Yes	Yes	Yes	No	Yes	Strongly agree	Strongly agree
179	26	21 - 30	Female	Unmarried	Single	Physician	Physician	1	< = 4 years	Bachelor	Bachelor and above	7	Government	Yes	Indoor	Indoor	Yes	No	No	No	No	No	No	36+	<=36	Hostel	Hostel	No	No	No	Yes	By walk	Walking	No	No	Yes	No	Yes	Yes	Yes	Yes	Yes	Yes	Yes	No	Yes	Yes	Strongly agree	Strongly agree
180	28	21 - 30	Female	Married	Married	Physician	Physician	5	> 4 years	Bachelor	Bachelor and above	1	Government	Yes	Emergency	Emergency	No	No	Yes	No	No	No	No	24 +	<=36	Hospital	Hospital	No	No	No	No	By walk	Walking	No	No	Yes	No	Yes	Yes	Yes	Yes	Yes	Yes	Yes	No	No	Yes	Strongly agree	Strongly agree
181	30	21 - 30	Female	Unmarried	Single	Physician	Physician	2	< = 4 years	Bachelor	Bachelor and above	12	Government	Yes	Outdoor, Emergency	More than one place	No	Yes	Yes	No	No	No	Yes	72 +	>36	Home	Home	Yes	No	No	No	By public transport	public transport	Yes	No	No	No	Yes	Yes	Yes	Yes	Yes	Yes	Yes	No	Yes	Yes	Strongly agree	Strongly agree
182	33	31 - 40	Male	Unmarried	Single	Physician	Physician	9	> 4 years	Bachelor	Bachelor and above	5	Government	Yes	Indoor	Indoor	Yes	No	No	No	No	No	No	60 +	>36	Dormitory	Dormitory	No	No	Yes	No	By public transport	public transport	Yes	No	No	No	Yes	Yes	Yes	Yes	Yes	Yes	Yes	Yes	Yes	Yes	Strongly agree	Strongly agree
183	31	31 - 40	Male	Married	Married	Physician	Physician	8	> 4 years	Bachelor	Bachelor and above	6	Private	Yes	Indoor	Indoor	Yes	No	No	No	No	No	No	72 +	>36	Home	Home	Yes	No	No	No	By private vehicle	private transport	No	No	No	Yes	Yes	Yes	Yes	Yes	Yes	Yes	Yes	No	No	Yes	Strongly agree	Strongly agree
184	32	31 - 40	Male	Married	Married	Physician	Physician	7	> 4 years	Bachelor	Bachelor and above	2	Government	Yes	Indoor	Indoor	Yes	No	No	No	No	No	No	48 +	>36	Home	Home	Yes	No	No	No	By public transport	public transport	Yes	No	No	No	Yes	Yes	Yes	Yes	Yes	Yes	Yes	No	Yes	Yes	Strongly agree	Strongly agree
185	36	31 - 40	Male	Married	Married	Physician	Physician	10	> 4 years	Bachelor	Bachelor and above	4	Government	Yes	Outdoor	Outdoor	No	Yes	No	No	No	No	No	48 +	>36	Hospital	Hospital	No	No	No	No	By walk	Walking	No	No	Yes	No	Yes	Yes	Yes	Yes	Yes	Yes	Yes	No	Yes	Yes	Strongly agree	Strongly agree
186	27	21 - 30	Female	Unmarried	Single	Physician	Physician	1	< = 4 years	Bachelor	Bachelor and above	7	Private	Yes	Indoor	Indoor	Yes	No	No	No	No	No	No	48 +	>36	Dormitory	Dormitory	No	No	Yes	No	By office transport	office transport	No	Yes	No	No	Yes	Yes	Yes	Yes	Yes	Yes	Yes	No	Yes	Yes	Strongly agree	Strongly agree
187	25	21 - 30	Male	Married	Married	Physician	Physician	1	< = 4 years	Bachelor	Bachelor and above	4	Private	Yes	Indoor	Indoor	Yes	No	No	No	No	No	No	48 +	>36	Dormitory	Dormitory	No	No	Yes	No	By office transport	office transport	No	Yes	No	No	Yes	Yes	Yes	Yes	Yes	Yes	Yes	Yes	Yes	Yes	Agree	Strongly agree
188	29	21 - 30	Male	Unmarried	Single	Physician	Physician	5	> 4 years	Bachelor	Bachelor and above	10	Government	Yes	Indoor, Outdoor, Emergency	More than one place	Yes	Yes	Yes	No	No	No	Yes	36+	<=36	Dormitory	Dormitory	No	No	Yes	No	By walk	Walking	No	No	Yes	No	Yes	Yes	Yes	Yes	Yes	Yes	Yes	No	Yes	Yes	Strongly agree	Strongly agree
189	33	31 - 40	Female	Married	Married	Physician	Physician	4	< = 4 years	Bachelor	Bachelor and above	4	Government	No	Indoor, Emergency	More than one place	Yes	No	Yes	No	No	No	Yes	48 +	>36	Hotel	Hotel	No	Yes	No	No	By walk	Walking	No	No	Yes	No	Yes	Yes	Yes	Yes	Yes	Yes	Yes	Yes	Yes	Yes	Strongly agree	Strongly agree
190	30	21 - 30	Male	Unmarried	Single	Physician	Physician	5	> 4 years	Masters	Bachelor and above	8	Government	Yes	Indoor, Outdoor, Emergency	More than one place	Yes	Yes	Yes	No	No	No	Yes	48 +	>36	Home	Home	Yes	No	No	No	By private vehicle	private transport	No	No	No	Yes	Yes	Yes	Yes	Yes	No	Yes	Yes	No	Yes	Yes	Strongly agree	Strongly agree
191	29	21 - 30	Male	Married	Married	Physician	Physician	4	< = 4 years	Bachelor	Bachelor and above	2	Private	Yes	Indoor, Outdoor, Emergency	More than one place	Yes	Yes	Yes	No	No	No	Yes	24 +	<=36	Home	Home	Yes	No	No	No	By public transport	public transport	Yes	No	No	No	Yes	Yes	Yes	Yes	Yes	Yes	Yes	Yes	Yes	Yes	Agree	Strongly agree
192	31	31 - 40	Male	Married	Married	Physician	Physician	6	> 4 years	Bachelor	Bachelor and above	2	Private	Yes	Indoor, Outdoor, Emergency	More than one place	Yes	Yes	Yes	No	No	No	Yes	24 +	<=36	Home	Home	Yes	No	No	No	By public transport	public transport	Yes	No	No	No	Yes	Yes	Yes	Yes	Yes	Yes	Yes	Yes	Yes	Yes	Agree	Strongly agree
193	29	21 - 30	Female	Married	Married	Physician	Physician	4	< = 4 years	Bachelor	Bachelor and above	2	Government	No	Indoor	Indoor	Yes	No	No	No	No	No	No	36+	<=36	Dormitory	Dormitory	No	No	Yes	No	By walk	Walking	No	No	Yes	No	Yes	Yes	Yes	Yes	No	Yes	Yes	Yes	Yes	Yes	Agree	Strongly agree
194	30	21 - 30	Female	Unmarried	Single	Physician	Physician	5	> 4 years	Bachelor	Bachelor and above	4	Government	Yes	Indoor	Indoor	Yes	No	No	No	No	No	No	24 +	<=36	Dormitory	Dormitory	No	No	Yes	No	By walk	Walking	No	No	Yes	No	Yes	Yes	Yes	Yes	Yes	Yes	Yes	No	Yes	Yes	Strongly agree	Strongly agree
195	25	21 - 30	Male	Unmarried	Single	Physician	Physician	1	< = 4 years	Bachelor	Bachelor and above	6	Government	Yes	Indoor	Indoor	Yes	No	No	No	No	No	No	36+	<=36	Home	Home	Yes	No	No	No	By private vehicle	private transport	No	No	No	Yes	Yes	Yes	Yes	Yes	Yes	Yes	Yes	No	Yes	Yes	Agree	Strongly agree
196	32	31 - 40	Male	Married	Married	Physician	Physician	7.5	> 4 years	Bachelor	Bachelor and above	2	Private	Yes	Indoor, Outdoor, Emergency	More than one place	Yes	Yes	Yes	No	No	No	Yes	48 +	>36	Home	Home	Yes	No	No	No	By office transport	office transport	No	Yes	No	No	Yes	Yes	Yes	Yes	Yes	Yes	Yes	Yes	Yes	Yes	Agree	Strongly agree
197	30	21 - 30	Female	Married	Married	Physician	Physician	5	> 4 years	Bachelor	Bachelor and above	6	Government	Yes	Emergency	Emergency	No	No	Yes	No	No	No	No	48 +	>36	Hospital	Hospital	No	No	No	No	By public transport	public transport	Yes	No	No	No	Yes	Yes	Yes	Yes	Yes	Yes	Yes	Yes	Yes	Yes	Strongly agree	Strongly agree
198	30	21 - 30	Male	Unmarried	Single	Physician	Physician	5	> 4 years	Bachelor	Bachelor and above	4	Government	No	Outdoor, Emergency	More than one place	No	Yes	Yes	No	No	No	Yes	24 +	<=36	Dormitory	Dormitory	No	No	Yes	No	By walk	Walking	No	No	Yes	No	Yes	Yes	Yes	Yes	Yes	Yes	Yes	Yes	Yes	Yes	Strongly agree	Strongly agree
199	30	21 - 30	Male	Unmarried	Single	Physician	Physician	6	> 4 years	Bachelor	Bachelor and above	4	Government	Yes	Outdoor	Outdoor	No	Yes	No	No	No	No	No	24 +	<=36	Dormitory	Dormitory	No	No	Yes	No	By walk	Walking	No	No	Yes	No	Yes	Yes	Yes	Yes	Yes	Yes	Yes	No	Yes	Yes	Strongly agree	Strongly agree
200	30	21 - 30	Male	Unmarried	Single	Physician	Physician	6	> 4 years	Bachelor	Bachelor and above	6	Government	No	Outdoor	Outdoor	No	Yes	No	No	No	No	No	24 +	<=36	Dormitory	Dormitory	No	No	Yes	No	By walk	Walking	No	No	Yes	No	Yes	Yes	Yes	Yes	No	Yes	No	Yes	Yes	Yes	Agree	Agree
201	30	21 - 30	Female	Unmarried	Single	Physician	Physician	5	> 4 years	Bachelor	Bachelor and above	5	Government	Yes	Indoor	Indoor	Yes	No	No	No	No	No	No	24 +	<=36	Dormitory	Dormitory	No	No	Yes	No	By walk	Walking	No	No	Yes	No	Yes	Yes	Yes	Yes	Yes	Yes	Yes	Yes	Yes	Yes	Strongly agree	Strongly agree
202	28	21 - 30	Female	Married	Married	Physician	Physician	3	< = 4 years	Bachelor	Bachelor and above	2	Private	No	Indoor, Outdoor, Emergency	More than one place	Yes	Yes	Yes	No	No	No	Yes	48 +	>36	Home	Home	Yes	No	No	No	By public transport	public transport	Yes	No	No	No	Yes	Yes	Yes	Yes	Yes	Yes	Yes	No	Yes	Yes	Strongly agree	Strongly agree
203	30	21 - 30	Male	Unmarried	Single	Physician	Physician	6	> 4 years	Bachelor	Bachelor and above	4	Private	Yes	Indoor, Outdoor, Emergency	More than one place	Yes	Yes	Yes	No	No	No	Yes	48 +	>36	Home	Home	Yes	No	No	No	By office transport	office transport	No	Yes	No	No	Yes	Yes	Yes	Yes	Yes	Yes	Yes	Yes	Yes	Yes	Strongly agree	Strongly agree
204	25	21 - 30	Male	Unmarried	Single	Physician	Physician	0	< = 4 years	Bachelor	Bachelor and above	4	Government	No	Indoor	Indoor	Yes	No	No	No	No	No	No	48 +	>36	Hostel	Hostel	No	No	No	Yes	By walk	Walking	No	No	Yes	No	Yes	Yes	Yes	Yes	No	Yes	Yes	Yes	Yes	Yes	Strongly agree	Strongly agree
205	24	21 - 30	Male	Unmarried	Single	Physician	Physician	0	< = 4 years	Bachelor	Bachelor and above	4	Government	No	Indoor	Indoor	Yes	No	No	No	No	No	No	48 +	>36	Hostel	Hostel	No	No	No	Yes	By walk	Walking	No	No	Yes	No	Yes	Yes	Yes	Yes	No	Yes	Yes	No	Yes	Yes	Agree	Strongly agree
206	31	31 - 40	Female	Unmarried	Single	Physician	Physician	5	> 4 years	Bachelor	Bachelor and above	4	Government	Yes	Emergency	Emergency	No	No	Yes	No	No	No	No	24 +	<=36	Home	Home	Yes	No	No	No	By private vehicle	private transport	No	No	No	Yes	Yes	Yes	Yes	Yes	Yes	Yes	Yes	No	Yes	Yes	Strongly agree	Agree
207	30	21 - 30	Male	Married	Married	Physician	Physician	3	< = 4 years	Bachelor	Bachelor and above	13	Government	Yes	Indoor, Outdoor, Emergency	More than one place	Yes	Yes	Yes	No	No	No	Yes	48 +	>36	Home	Home	Yes	No	No	No	By public transport	public transport	Yes	No	No	No	Yes	Yes	Yes	Yes	Yes	Yes	Yes	No	No	Yes	Strongly agree	Agree
208	26	21 - 30	Male	Unmarried	Single	Physician	Physician	3	< = 4 years	Masters	Bachelor and above	1	Private	Yes	Indoor	Indoor	Yes	No	No	No	No	No	No	48 +	>36	Hotel	Hotel	No	Yes	No	No	By office transport	office transport	No	Yes	No	No	Yes	Yes	Yes	Yes	Yes	Yes	Yes	Yes	Yes	Yes	Disagree	Disagree
209	31	31 - 40	Male	Married	Married	Physician	Physician	4	< = 4 years	Bachelor	Bachelor and above	3	Government	No	Outdoor, Emergency	More than one place	No	Yes	Yes	No	No	No	Yes	36+	<=36	Home	Home	Yes	No	No	No	By public transport	public transport	Yes	No	No	No	Yes	Yes	Yes	Yes	Yes	Yes	Yes	No	No	Yes	Agree	Neither agree nor disagree
210	24	21 - 30	Female	Unmarried	Single	Physician	Physician	#NULL!	#NULL!	Bachelor	Bachelor and above	2	Government	Yes	Indoor	Indoor	Yes	No	No	No	No	No	No	60 +	>36	Hostel	Hostel	No	No	No	Yes	By walk	Walking	No	No	Yes	No	Yes	Yes	Yes	Yes	Yes	Yes	Yes	No	No	No	Strongly agree	Strongly agree
211	25	21 - 30	Female	Unmarried	Single	Physician	Physician	1	< = 4 years	Bachelor	Bachelor and above	5	Government	Yes	Indoor	Indoor	Yes	No	No	No	No	No	No	36+	<=36	Hostel	Hostel	No	No	No	Yes	By walk	Walking	No	No	Yes	No	Yes	Yes	Yes	Yes	Yes	Yes	Yes	Yes	Yes	Yes	Strongly agree	Strongly agree
212	30	21 - 30	Male	Married	Married	Physician	Physician	5	> 4 years	Bachelor	Bachelor and above	6	Government	Yes	Indoor, Outdoor, Emergency	More than one place	Yes	Yes	Yes	No	No	No	Yes	48 +	>36	Home	Home	Yes	No	No	No	By private vehicle	private transport	No	No	No	Yes	Yes	Yes	Yes	Yes	No	Yes	Yes	No	Yes	Yes	Strongly agree	Strongly agree
213	27	21 - 30	Female	Unmarried	Single	Physician	Physician	2	< = 4 years	Bachelor	Bachelor and above	#NULL!	Private	Yes	SARI ITC	Indoor	Yes	No	No	No	No	No	No	48 +	>36	Hotel	Hotel	No	Yes	No	No	By office transport	office transport	No	Yes	No	No	Yes	Yes	Yes	Yes	Yes	Yes	Yes	No	No	Yes	Agree	Disagree
214	25	21 - 30	Female	Unmarried	Single	Physician	Physician	2	< = 4 years	Bachelor	Bachelor and above	5	Private	Yes	Indoor	Indoor	Yes	No	No	No	No	No	No	48 +	>36	Home	Home	Yes	No	No	No	By private vehicle	private transport	No	No	No	Yes	Yes	Yes	Yes	Yes	Yes	Yes	Yes	No	Yes	Yes	Strongly agree	Agree
215	28	21 - 30	Male	Unmarried	Single	Physician	Physician	2.2	< = 4 years	Bachelor	Bachelor and above	5	Private	Yes	Indoor	Indoor	Yes	No	No	No	No	No	No	36+	<=36	Hotel	Hotel	No	Yes	No	No	By office transport	office transport	No	Yes	No	No	Yes	Yes	Yes	Yes	Yes	Yes	Yes	Yes	Yes	Yes	Agree	Strongly agree
216	25	21 - 30	Male	Unmarried	Single	Physician	Physician	0	< = 4 years	Bachelor	Bachelor and above	4	Government	No	Indoor	Indoor	Yes	No	No	No	No	No	No	36+	<=36	Hostel	Hostel	No	No	No	Yes	By walk	Walking	No	No	Yes	No	Yes	Yes	Yes	Yes	No	Yes	Yes	No	Yes	Yes	Agree	Strongly agree
217	25	21 - 30	Male	Unmarried	Single	Physician	Physician	0	< = 4 years	Bachelor	Bachelor and above	5	Government	No	Indoor	Indoor	Yes	No	No	No	No	No	No	36+	<=36	Hostel	Hostel	No	No	No	Yes	By walk	Walking	No	No	Yes	No	Yes	Yes	Yes	Yes	No	Yes	Yes	Yes	Yes	Yes	Agree	Agree
218	25	21 - 30	Female	Unmarried	Single	Physician	Physician	0	< = 4 years	Bachelor	Bachelor and above	4	Government	Yes	Indoor	Indoor	Yes	No	No	No	No	No	No	36+	<=36	Home	Home	Yes	No	No	No	By private vehicle	private transport	No	No	No	Yes	Yes	Yes	Yes	Yes	Yes	Yes	Yes	Yes	Yes	Yes	Strongly agree	Strongly agree
219	25	21 - 30	Female	Unmarried	Single	Physician	Physician	0	< = 4 years	Bachelor	Bachelor and above	6	Government	No	Indoor	Indoor	Yes	No	No	No	No	No	No	36+	<=36	Hostel	Hostel	No	No	No	Yes	By walk	Walking	No	No	Yes	No	Yes	Yes	Yes	Yes	No	Yes	Yes	Yes	Yes	Yes	Agree	Strongly agree
220	25	21 - 30	Male	Unmarried	Single	Physician	Physician	0.25	< = 4 years	Bachelor	Bachelor and above	5	Government	No	Indoor	Indoor	Yes	No	No	No	No	No	No	36+	<=36	Hostel	Hostel	No	No	No	Yes	By walk	Walking	No	No	Yes	No	Yes	Yes	Yes	Yes	No	Yes	Yes	No	Yes	Yes	Agree	Agree
221	26	21 - 30	Female	Unmarried	Single	Nurse	Non-physician	3.5	< = 4 years	Diploma	Diploma	5	Government	No	Indoor	Indoor	Yes	No	No	No	No	No	No	36+	<=36	Hostel	Hostel	No	No	No	Yes	By walk	Walking	No	No	Yes	No	Yes	Yes	Yes	Yes	No	Yes	Yes	No	Yes	Yes	Agree	Agree
222	26	21 - 30	Female	Unmarried	Single	Nurse	Non-physician	4	< = 4 years	Diploma	Diploma	4	Government	No	Indoor	Indoor	Yes	No	No	No	No	No	No	36+	<=36	Hostel	Hostel	No	No	No	Yes	By walk	Walking	No	No	Yes	No	Yes	Yes	Yes	Yes	No	Yes	Yes	Yes	Yes	Yes	Agree	Strongly agree
223	28	21 - 30	Female	Married	Married	Nurse	Non-physician	5	> 4 years	Diploma	Diploma	2	Government	No	Indoor	Indoor	Yes	No	No	No	No	No	No	36+	<=36	Home	Home	Yes	No	No	No	By public transport	public transport	Yes	No	No	No	Yes	Yes	Yes	Yes	Yes	Yes	Yes	Yes	Yes	Yes	Strongly agree	Strongly agree
224	28	21 - 30	Male	Unmarried	Single	Physician	Physician	4	< = 4 years	Bachelor	Bachelor and above	5	Government	Yes	Outdoor	Outdoor	No	Yes	No	No	No	No	No	24 +	<=36	Dormitory	Dormitory	No	No	Yes	No	By walk	Walking	No	No	Yes	No	Yes	Yes	Yes	Yes	Yes	Yes	Yes	Yes	Yes	Yes	Strongly agree	Strongly agree
225	30	21 - 30	Male	Unmarried	Single	Physician	Physician	5	> 4 years	Bachelor	Bachelor and above	4	Government	Yes	Outdoor, Emergency	More than one place	No	Yes	Yes	No	No	No	Yes	24 +	<=36	Dormitory	Dormitory	No	No	Yes	No	By walk	Walking	No	No	Yes	No	Yes	Yes	Yes	Yes	Yes	Yes	Yes	Yes	Yes	Yes	Strongly agree	Strongly agree
226	30	21 - 30	Female	Married	Married	Physician	Physician	5	> 4 years	Bachelor	Bachelor and above	2	Government	Yes	Indoor, Outdoor	More than one place	Yes	Yes	No	No	No	No	Yes	24 +	<=36	Home	Home	Yes	No	No	No	By public transport	public transport	Yes	No	No	No	Yes	Yes	Yes	Yes	Yes	Yes	Yes	No	Yes	Yes	Agree	Agree
227	29	21 - 30	Male	Unmarried	Single	Physician	Physician	4.5	> 4 years	Bachelor	Bachelor and above	6	Government	Yes	Indoor	Indoor	Yes	No	No	No	No	No	No	24 +	<=36	Dormitory	Dormitory	No	No	Yes	No	By walk	Walking	No	No	Yes	No	Yes	Yes	Yes	Yes	Yes	Yes	Yes	Yes	Yes	Yes	Agree	Strongly agree
228	29	21 - 30	Female	Unmarried	Single	Physician	Physician	4.5	> 4 years	Bachelor	Bachelor and above	4	Private	Yes	Indoor, Emergency	More than one place	Yes	No	Yes	No	No	No	Yes	24 +	<=36	Home	Home	Yes	No	No	No	By office transport	office transport	No	Yes	No	No	Yes	Yes	Yes	Yes	Yes	Yes	Yes	Yes	Yes	Yes	Strongly agree	Strongly agree
229	33	31 - 40	Male	Married	Married	Physician	Physician	4	< = 4 years	Bachelor	Bachelor and above	2	Private	Yes	Indoor, Outdoor, Emergency	More than one place	Yes	Yes	Yes	No	No	No	Yes	48 +	>36	Home	Home	Yes	No	No	No	By walk	Walking	No	No	Yes	No	Yes	Yes	Yes	Yes	Yes	Yes	Yes	Yes	Yes	Yes	Strongly agree	Strongly agree
230	24	21 - 30	Male	Unmarried	Single	Physician	Physician	1	< = 4 years	Bachelor	Bachelor and above	2	Government	No	Emergency	Emergency	No	No	Yes	No	No	No	No	48 +	>36	Hospital	Hospital	No	No	No	No	By walk	Walking	No	No	Yes	No	Yes	Yes	Yes	Yes	Yes	Yes	Yes	No	Yes	Yes	Strongly agree	Strongly agree
231	25	21 - 30	Female	Unmarried	Single	Physician	Physician	0.5	< = 4 years	Bachelor	Bachelor and above	5	Government	No	Indoor	Indoor	Yes	No	No	No	No	No	No	12 +	<=36	Hostel	Hostel	No	No	No	Yes	By walk	Walking	No	No	Yes	No	Yes	Yes	Yes	Yes	No	Yes	Yes	Yes	Yes	Yes	Agree	Agree
232	29	21 - 30	Female	Married	Married	Physician	Physician	5	> 4 years	Bachelor	Bachelor and above	5	Government	Yes	Outdoor	Outdoor	No	Yes	No	No	No	No	No	24 +	<=36	Home	Home	Yes	No	No	No	By private vehicle	private transport	No	No	No	Yes	Yes	Yes	Yes	Yes	Yes	Yes	Yes	No	No	Yes	Strongly agree	Strongly agree
233	23	21 - 30	Female	Unmarried	Single	Physician	Physician	1	< = 4 years	Masters	Bachelor and above	4	Government	Yes	Indoor, Outdoor, Emergency	More than one place	Yes	Yes	Yes	No	No	No	Yes	48 +	>36	Hospital	Hospital	No	No	No	No	By walk	Walking	No	No	Yes	No	Yes	Yes	No	Yes	Yes	Yes	Yes	Yes	Yes	Yes	Agree	Strongly agree
234	23	21 - 30	Female	Unmarried	Single	Physician	Physician	1	< = 4 years	Masters	Bachelor and above	4	Government	Yes	Indoor, Outdoor, Emergency	More than one place	Yes	Yes	Yes	No	No	No	Yes	48 +	>36	Hospital	Hospital	No	No	No	No	By walk	Walking	No	No	Yes	No	Yes	Yes	No	Yes	Yes	Yes	Yes	Yes	Yes	Yes	Agree	Strongly agree
235	29	21 - 30	Male	Unmarried	Single	Physician	Physician	4	< = 4 years	Bachelor	Bachelor and above	1	Private	Yes	Indoor, Outdoor, Emergency	More than one place	Yes	Yes	Yes	No	No	No	Yes	48 +	>36	Home	Home	Yes	No	No	No	By office transport	office transport	No	Yes	No	No	Yes	Yes	Yes	Yes	Yes	Yes	Yes	No	Yes	Yes	Disagree	Strongly agree
236	25	21 - 30	Female	Married	Married	Nurse	Non-physician	5	> 4 years	Diploma	Diploma	3	Private	No	Indoor	Indoor	Yes	No	No	No	No	No	No	48 +	>36	Hostel	Hostel	No	No	No	Yes	By walk	Walking	No	No	Yes	No	Yes	Yes	Yes	Yes	Yes	Yes	No	Yes	Yes	Yes	Strongly agree	Strongly agree
237	22	21 - 30	Female	Married	Married	Nurse	Non-physician	2	< = 4 years	Diploma	Diploma	2	Private	Yes	Indoor	Indoor	Yes	No	No	No	No	No	No	48 +	>36	Hostel	Hostel	No	No	No	Yes	By walk	Walking	No	No	Yes	No	Yes	Yes	Yes	Yes	Yes	Yes	No	Yes	Yes	Yes	Agree	Strongly agree
238	24	21 - 30	Female	Unmarried	Single	Nurse	Non-physician	3	< = 4 years	Diploma	Diploma	1	Private	Yes	Indoor	Indoor	Yes	No	No	No	No	No	No	48 +	>36	Hostel	Hostel	No	No	No	Yes	By walk	Walking	No	No	Yes	No	Yes	Yes	Yes	Yes	Yes	Yes	Yes	No	Yes	Yes	Agree	Agree
239	30	21 - 30	Male	Married	Married	Nurse	Non-physician	8	> 4 years	Diploma	Diploma	5	Private	No	Indoor, Laboratory	More than one place	Yes	No	No	No	Yes	No	Yes	36+	<=36	Home	Home	Yes	No	No	No	By public transport	public transport	Yes	No	No	No	Yes	Yes	Yes	Yes	Yes	Yes	Yes	Yes	Yes	No	Agree	Strongly agree
240	24	21 - 30	Female	Married	Married	Nurse	Non-physician	3	< = 4 years	Diploma	Diploma	3	Private	No	Indoor	Indoor	Yes	No	No	No	No	No	No	48 +	>36	Home	Home	Yes	No	No	No	By public transport	public transport	Yes	No	No	No	Yes	Yes	Yes	Yes	Yes	Yes	No	Yes	Yes	Yes	Agree	Agree
241	25	21 - 30	Female	Married	Married	Nurse	Non-physician	3	< = 4 years	Diploma	Diploma	3	Private	No	Indoor	Indoor	Yes	No	No	No	No	No	No	48 +	>36	Hostel	Hostel	No	No	No	Yes	By public transport	public transport	Yes	No	No	No	Yes	Yes	Yes	Yes	Yes	Yes	Yes	Yes	Yes	Yes	Agree	Agree
242	32	31 - 40	Female	Married	Married	Nurse	Non-physician	9	> 4 years	Diploma	Diploma	5	Private	Yes	Indoor	Indoor	Yes	No	No	No	No	No	No	48 +	>36	Home	Home	Yes	No	No	No	By public transport	public transport	Yes	No	No	No	Yes	Yes	Yes	Yes	Yes	Yes	Yes	Yes	Yes	Yes	Agree	Strongly agree
243	29	21 - 30	Female	Married	Married	Physician	Physician	5	> 4 years	Masters	Bachelor and above	2	Private	Yes	Indoor	Indoor	Yes	No	No	No	No	No	No	48 +	>36	Hotel	Hotel	No	Yes	No	No	By office transport	office transport	No	Yes	No	No	Yes	Yes	Yes	Yes	Yes	Yes	Yes	Yes	Yes	Yes	Agree	Strongly agree
244	32	31 - 40	Male	Unmarried	Single	Physician	Physician	4	< = 4 years	Bachelor	Bachelor and above	2	Private	Yes	Emergency	Emergency	No	No	Yes	No	No	No	No	48 +	>36	Home	Home	Yes	No	No	No	By office transport	office transport	No	Yes	No	No	Yes	Yes	Yes	Yes	Yes	Yes	Yes	Yes	Yes	Yes	Strongly agree	Strongly agree
245	28	21 - 30	Male	Unmarried	Single	Laboratory Technician	Non-physician	4	< = 4 years	Bachelor	Bachelor and above	5	Private	Yes	Laboratory	Laboratory	No	No	No	No	Yes	No	No	48 +	>36	Home	Home	Yes	No	No	No	By office transport	office transport	No	Yes	No	No	Yes	Yes	Yes	Yes	Yes	Yes	Yes	Yes	Yes	Yes	Strongly agree	Agree
246	34	31 - 40	Male	Married	Married	Physician	Physician	9	> 4 years	Bachelor	Bachelor and above	5	Government	Yes	ICU (Intensive Care Unit)	ICU	No	No	No	No	No	Yes	No	36+	<=36	Home	Home	Yes	No	No	No	By public transport	public transport	Yes	No	No	No	Yes	Yes	Yes	Yes	Yes	No	Yes	No	No	Yes	Strongly agree	Agree
247	29	21 - 30	Female	Married	Married	Physician	Physician	5	> 4 years	Bachelor	Bachelor and above	1	Private	No	Indoor	Indoor	Yes	No	No	No	No	No	No	48 +	>36	Home	Home	Yes	No	No	No	By office transport	office transport	No	Yes	No	No	Yes	Yes	Yes	Yes	Yes	Yes	Yes	Yes	No	Yes	Strongly agree	Strongly agree
248	27	21 - 30	Female	Unmarried	Single	Nurse	Non-physician	4	< = 4 years	Bachelor	Bachelor and above	3	Government	Yes	Indoor, Outdoor, Emergency, Vaccination	More than one place	Yes	Yes	Yes	No	No	No	Yes	48 +	>36	Home	Home	Yes	No	No	No	By public transport	public transport	Yes	No	No	No	Yes	Yes	Yes	Yes	Yes	Yes	Yes	No	Yes	Yes	Strongly agree	Agree
249	30	21 - 30	Male	Married	Married	Physician	Physician	3	< = 4 years	Bachelor	Bachelor and above	7	Private	Yes	Emergency	Emergency	No	No	Yes	No	No	No	No	48 +	>36	Hotel	Hotel	No	Yes	No	No	By office transport	office transport	No	Yes	No	No	Yes	Yes	Yes	Yes	Yes	Yes	Yes	Yes	Yes	Yes	Strongly agree	Strongly agree
250	26	21 - 30	Male	Married	Married	Physician	Physician	6	> 4 years	Masters	Bachelor and above	3	Private	Yes	Indoor, Outdoor	More than one place	Yes	Yes	No	No	No	No	Yes	48 +	>36	Hospital	Hospital	No	No	No	No	By office transport	office transport	No	Yes	No	No	Yes	No	Yes	Yes	No	Yes	Yes	No	No	No	Disagree	Agree
251	27	21 - 30	Male	Married	Married	Physician	Physician	3	< = 4 years	Bachelor	Bachelor and above	8	Private	Yes	Covid unit	Indoor	Yes	No	No	No	No	No	No	24 +	<=36	Hospital	Hospital	No	No	No	No	By walk	Walking	No	No	Yes	No	Yes	Yes	Yes	Yes	Yes	No	Yes	No	Yes	Yes	Strongly agree	Agree
252	28	21 - 30	Male	Unmarried	Single	Physician	Physician	4	< = 4 years	Bachelor	Bachelor and above	3	Private	Yes	Outdoor	Outdoor	No	Yes	No	No	No	No	No	48 +	>36	Home	Home	Yes	No	No	No	By office transport	office transport	No	Yes	No	No	Yes	Yes	Yes	Yes	Yes	Yes	Yes	No	Yes	Yes	Disagree	Strongly agree
253	28	21 - 30	Male	Unmarried	Single	Physician	Physician	8.5	> 4 years	Masters	Bachelor and above	3	Private	Yes	Indoor	Indoor	Yes	No	No	No	No	No	No	48 +	>36	Hospital	Hospital	No	No	No	No	By office transport	office transport	No	Yes	No	No	Yes	Yes	Yes	Yes	No	Yes	Yes	Yes	Yes	Yes	Strongly agree	Strongly agree
254	33	31 - 40	Female	Married	Married	Physician	Physician	5	> 4 years	Bachelor	Bachelor and above	2	Private	Yes	Outdoor	Outdoor	No	Yes	No	No	No	No	No	48 +	>36	Home	Home	Yes	No	No	No	By office transport	office transport	No	Yes	No	No	Yes	Yes	Yes	Yes	Yes	Yes	Yes	Yes	Yes	Yes	Agree	Strongly agree
255	30	21 - 30	Female	Married	Married	Physician	Physician	3	< = 4 years	Bachelor	Bachelor and above	5	Private	Yes	Indoor, Outdoor, Emergency	More than one place	Yes	Yes	Yes	No	No	No	Yes	60 +	>36	Home	Home	Yes	No	No	No	By private vehicle	private transport	No	No	No	Yes	Yes	Yes	Yes	Yes	No	Yes	No	No	Yes	No	Agree	Neither agree nor disagree
256	28	21 - 30	Male	Married	Married	Physician	Physician	2	< = 4 years	Bachelor	Bachelor and above	5	Private	Yes	Indoor, Outdoor	More than one place	Yes	Yes	No	No	No	No	Yes	48 +	>36	Home	Home	Yes	No	No	No	By office transport	office transport	No	Yes	No	No	Yes	Yes	Yes	Yes	Yes	Yes	Yes	Yes	Yes	Yes	Disagree	Strongly agree
257	31	31 - 40	Male	Unmarried	Single	Physician	Physician	7	> 4 years	Bachelor	Bachelor and above	1	Private	Yes	Indoor	Indoor	Yes	No	No	No	No	No	No	72 +	>36	Hostel	Hostel	No	No	No	Yes	By office transport	office transport	No	Yes	No	No	Yes	Yes	Yes	Yes	No	Yes	Yes	Yes	No	Yes	Strongly agree	Strongly agree
258	28	21 - 30	Male	Unmarried	Single	Physician	Physician	3	< = 4 years	Bachelor	Bachelor and above	3	Private	Yes	Indoor	Indoor	Yes	No	No	No	No	No	No	48 +	>36	Hotel	Hotel	No	Yes	No	No	By office transport	office transport	No	Yes	No	No	Yes	Yes	Yes	Yes	Yes	No	Yes	No	Yes	Yes	Strongly disagree	Strongly agree
259	28	21 - 30	Male	Unmarried	Single	Pharmacist	Non-physician	5	> 4 years	Bachelor	Bachelor and above	2	Private	Yes	Pharmacy	Pharmacy	No	No	No	Yes	No	No	No	48 +	>36	Home	Home	Yes	No	No	No	By office transport	office transport	No	Yes	No	No	Yes	Yes	Yes	Yes	Yes	No	Yes	Yes	No	No	Agree	Strongly agree
260	30	21 - 30	Male	Married	Married	Physician	Physician	5	> 4 years	Bachelor	Bachelor and above	4	Government	Yes	Outdoor	Outdoor	No	Yes	No	No	No	No	No	36+	<=36	Dormitory	Dormitory	No	No	Yes	No	By walk	Walking	No	No	Yes	No	Yes	Yes	Yes	Yes	Yes	Yes	Yes	Yes	Yes	Yes	Agree	Agree
261	22	21 - 30	Female	Unmarried	Single	Nurse	Non-physician	3	< = 4 years	Diploma	Diploma	5	Government	Yes	Emergency	Emergency	No	No	Yes	No	No	No	No	48 +	>36	Hospital	Hospital	No	No	No	No	By office transport	office transport	No	Yes	No	No	Yes	Yes	Yes	Yes	Yes	Yes	Yes	Yes	Yes	Yes	Agree	Agree
262	25	21 - 30	Male	Married	Married	Nurse	Non-physician	3	< = 4 years	Diploma	Diploma	4	Private	Yes	ICU (Intensive Care Unit)	ICU	No	No	No	No	No	Yes	No	48 +	>36	Hostel	Hostel	No	No	No	Yes	By walk	Walking	No	No	Yes	No	Yes	Yes	No	Yes	Yes	Yes	Yes	Yes	Yes	Yes	Agree	Agree
263	38	31 - 40	Male	Widowed	Single	Nurse	Non-physician	15	> 4 years	Diploma	Diploma	4	Private	No	Indoor	Indoor	Yes	No	No	No	No	No	No	48 +	>36	Home	Home	Yes	No	No	No	By public transport	public transport	Yes	No	No	No	Yes	Yes	Yes	Yes	Yes	Yes	Yes	Yes	Yes	Yes	Strongly agree	Agree
264	28	21 - 30	Female	Married	Married	Pharmacist	Non-physician	5	> 4 years	Masters	Bachelor and above	5	Private	Yes	Pharmacy	Pharmacy	No	No	No	Yes	No	No	No	48 +	>36	Home	Home	Yes	No	No	No	By office transport	office transport	No	Yes	No	No	Yes	Yes	Yes	Yes	Yes	Yes	Yes	Yes	Yes	Yes	Strongly agree	Strongly agree
265	29	21 - 30	Male	Married	Married	Nurse	Non-physician	6	> 4 years	Diploma	Diploma	4	Private	No	ICU (Intensive Care Unit)	ICU	No	No	No	No	No	Yes	No	48 +	>36	Hostel	Hostel	No	No	No	Yes	By walk	Walking	No	No	Yes	No	Yes	Yes	Yes	Yes	Yes	Yes	Yes	Yes	Yes	Yes	Strongly agree	Strongly agree
266	40	31 - 40	Male	Married	Married	Nurse	Non-physician	40	> 4 years	Diploma	Diploma	18	Private	No	Outdoor	Outdoor	No	Yes	No	No	No	No	No	48 +	>36	Home	Home	Yes	No	No	No	By public transport	public transport	Yes	No	No	No	Yes	Yes	No	Yes	Yes	Yes	Yes	Yes	Yes	Yes	Strongly agree	Agree
267	25	21 - 30	Male	Married	Married	Nurse	Non-physician	2	< = 4 years	Diploma	Diploma	2	Private	No	ICU (Intensive Care Unit)	ICU	No	No	No	No	No	Yes	No	48 +	>36	Hostel	Hostel	No	No	No	Yes	By walk	Walking	No	No	Yes	No	Yes	Yes	Yes	Yes	Yes	Yes	Yes	Yes	Yes	Yes	Agree	Neither agree nor disagree
268	23	21 - 30	Female	Unmarried	Single	Nurse	Non-physician	1	< = 4 years	Diploma	Diploma	12	Private	No	ICU (Intensive Care Unit)	ICU	No	No	No	No	No	Yes	No	48 +	>36	Hostel	Hostel	No	No	No	Yes	By walk	Walking	No	No	Yes	No	Yes	Yes	No	Yes	Yes	Yes	Yes	Yes	Yes	Yes	Strongly agree	Strongly agree
269	32	31 - 40	Female	Married	Married	Pharmacist	Non-physician	7	> 4 years	Bachelor	Bachelor and above	2	Private	Yes	Pharmacy	Pharmacy	No	No	No	Yes	No	No	No	60 +	>36	Home	Home	Yes	No	No	No	By private vehicle	private transport	No	No	No	Yes	Yes	Yes	Yes	No	Yes	Yes	Yes	Yes	Yes	Yes	Agree	Agree
270	22	21 - 30	Female	Unmarried	Single	Nurse	Non-physician	1	< = 4 years	Diploma	Diploma	8	Private	Yes	ICU (Intensive Care Unit)	ICU	No	No	No	No	No	Yes	No	48 +	>36	Home	Home	Yes	No	No	No	By public transport	public transport	Yes	No	No	No	Yes	Yes	No	Yes	Yes	Yes	Yes	No	Yes	Yes	Agree	Agree
271	33	31 - 40	Male	Married	Married	Physician	Physician	6	> 4 years	Bachelor	Bachelor and above	5	Private	Yes	Emergency	Emergency	No	No	Yes	No	No	No	No	36+	<=36	Dormitory	Dormitory	No	No	Yes	No	By office transport	office transport	No	Yes	No	No	Yes	Yes	Yes	Yes	Yes	Yes	Yes	No	Yes	Yes	Strongly agree	Strongly agree
272	29	21 - 30	Male	Married	Married	Physician	Physician	4	< = 4 years	Bachelor	Bachelor and above	5	Private	Yes	Indoor, Outdoor, Emergency	More than one place	Yes	Yes	Yes	No	No	No	Yes	72 +	>36	Hospital	Hospital	No	No	No	No	By public transport	public transport	Yes	No	No	No	Yes	Yes	Yes	Yes	Yes	Yes	Yes	Yes	Yes	Yes	Strongly agree	Strongly agree
273	28	21 - 30	Male	Unmarried	Single	Physician	Physician	5	> 4 years	Bachelor	Bachelor and above	5	Government	Yes	Indoor	Indoor	Yes	No	No	No	No	No	No	36+	<=36	Home	Home	Yes	No	No	No	By walk	Walking	No	No	Yes	No	Yes	No	Yes	Yes	No	Yes	Yes	Yes	Yes	Yes	Strongly agree	Strongly agree
274	28	21 - 30	Female	Married	Married	Physician	Physician	4	< = 4 years	Bachelor	Bachelor and above	6	Government	Yes	Indoor	Indoor	Yes	No	No	No	No	No	No	36+	<=36	Home	Home	Yes	No	No	No	By walk	Walking	No	No	Yes	No	Yes	No	Yes	Yes	No	Yes	Yes	Yes	Yes	Yes	Strongly agree	Strongly agree
275	30	21 - 30	Male	Married	Married	Physician	Physician	10	> 4 years	Bachelor	Bachelor and above	2	Government	Yes	Outdoor	Outdoor	No	Yes	No	No	No	No	No	48 +	>36	Home	Home	Yes	No	No	No	By walk	Walking	No	No	Yes	No	Yes	Yes	Yes	Yes	Yes	Yes	Yes	Yes	Yes	Yes	Strongly agree	Strongly agree
276	26	21 - 30	Male	Unmarried	Single	Nurse	Non-physician	4	< = 4 years	Diploma	Diploma	3	Government	Yes	Emergency	Emergency	No	No	Yes	No	No	No	No	48 +	>36	Home	Home	Yes	No	No	No	By private vehicle	private transport	No	No	No	Yes	Yes	Yes	Yes	Yes	No	Yes	Yes	Yes	Yes	Yes	Strongly agree	Agree
277	26	21 - 30	Female	Married	Married	Laboratory Technician	Non-physician	2	< = 4 years	Bachelor	Bachelor and above	4	Private	No	Laboratory	Laboratory	No	No	No	No	Yes	No	No	60 +	>36	Home	Home	Yes	No	No	No	By private vehicle	private transport	No	No	No	Yes	Yes	Yes	Yes	No	Yes	Yes	Yes	Yes	Yes	Yes	Strongly agree	Agree
278	28	21 - 30	Male	Married	Married	Nurse	Non-physician	5	> 4 years	Diploma	Diploma	4	Private	Yes	ICU (Intensive Care Unit)	ICU	No	No	No	No	No	Yes	No	48 +	>36	Home	Home	Yes	No	No	No	By public transport	public transport	Yes	No	No	No	Yes	Yes	Yes	Yes	Yes	Yes	Yes	Yes	Yes	Yes	Agree	Agree
279	32	31 - 40	Male	Married	Married	Nurse	Non-physician	7	> 4 years	Diploma	Diploma	4	Private	Yes	ICU (Intensive Care Unit)	ICU	No	No	No	No	No	Yes	No	48 +	>36	Home	Home	Yes	No	No	No	By public transport	public transport	Yes	No	No	No	Yes	No	Yes	Yes	Yes	Yes	Yes	Yes	Yes	Yes	Strongly agree	Agree
280	24	21 - 30	Male	Unmarried	Single	Nurse	Non-physician	1	< = 4 years	Diploma	Diploma	2	Private	No	Indoor	Indoor	Yes	No	No	No	No	No	No	48 +	>36	Home	Home	Yes	No	No	No	By public transport	public transport	Yes	No	No	No	Yes	Yes	Yes	Yes	Yes	Yes	Yes	Yes	Yes	No	Agree	Strongly agree
281	22	21 - 30	Male	Unmarried	Single	Nurse	Non-physician	1	< = 4 years	Diploma	Diploma	12	Private	No	Indoor	Indoor	Yes	No	No	No	No	No	No	48 +	>36	Hostel	Hostel	No	No	No	Yes	By walk	Walking	No	No	Yes	No	Yes	Yes	No	Yes	Yes	Yes	Yes	Yes	Yes	Yes	Strongly agree	Strongly agree
282	34	31 - 40	Female	Married	Married	Physician	Physician	8	> 4 years	Bachelor	Bachelor and above	5	Government	Yes	Indoor	Indoor	Yes	No	No	No	No	No	No	60 +	>36	Hotel	Hotel	No	Yes	No	No	By office transport	office transport	No	Yes	No	No	Yes	Yes	Yes	Yes	Yes	Yes	Yes	Yes	Yes	Yes	Strongly agree	Strongly agree
283	26	21 - 30	Male	Unmarried	Single	Nurse	Non-physician	4	< = 4 years	Diploma	Diploma	3	Government	Yes	Emergency	Emergency	No	No	Yes	No	No	No	No	48 +	>36	Home	Home	Yes	No	No	No	By private vehicle	private transport	No	No	No	Yes	Yes	Yes	Yes	Yes	No	Yes	Yes	Yes	Yes	Yes	Strongly agree	Agree
284	58	51 - 60	Female	Married	Married	Nurse	Non-physician	34	> 4 years	Diploma	Diploma	4	Government	Yes	Indoor	Indoor	Yes	No	No	No	No	No	No	48 +	>36	Home	Home	Yes	No	No	No	By public transport	public transport	Yes	No	No	No	Yes	Yes	Yes	Yes	Yes	Yes	Yes	Yes	Yes	Yes	Strongly agree	Strongly agree
285	56	51 - 60	Male	Married	Married	Nurse	Non-physician	36	> 4 years	Diploma	Diploma	5	Government	No	Outdoor, Emergency	More than one place	No	Yes	Yes	No	No	No	Yes	48 +	>36	Home	Home	Yes	No	No	No	By private vehicle	private transport	No	No	No	Yes	Yes	Yes	Yes	Yes	No	Yes	Yes	Yes	Yes	Yes	Strongly agree	Strongly agree
286	35	31 - 40	Female	Married	Married	Nurse	Non-physician	6	> 4 years	Bachelor	Bachelor and above	6	Government	No	Indoor	Indoor	Yes	No	No	No	No	No	No	48 +	>36	Home	Home	Yes	No	No	No	By private vehicle	private transport	No	No	No	Yes	Yes	Yes	Yes	Yes	Yes	Yes	Yes	Yes	Yes	Yes	Strongly agree	Strongly agree
287	57	51 - 60	Female	Married	Married	Nurse	Non-physician	34	> 4 years	Diploma	Diploma	4	Government	Yes	Indoor	Indoor	Yes	No	No	No	No	No	No	48 +	>36	Home	Home	Yes	No	No	No	By walk	Walking	No	No	Yes	No	Yes	Yes	Yes	Yes	Yes	Yes	Yes	Yes	Yes	Yes	Strongly agree	Strongly agree
288	50	41 - 50	Female	Married	Married	Nurse	Non-physician	22	> 4 years	Bachelor	Bachelor and above	4	Government	No	Indoor	Indoor	Yes	No	No	No	No	No	No	48 +	>36	Home	Home	Yes	No	No	No	By walk	Walking	No	No	Yes	No	Yes	Yes	Yes	Yes	Yes	Yes	Yes	Yes	Yes	Yes	Strongly agree	Strongly agree
289	24	21 - 30	Female	Married	Married	Nurse	Non-physician	2	< = 4 years	Diploma	Diploma	2	Private	Yes	Indoor	Indoor	Yes	No	No	No	No	No	No	48 +	>36	Home	Home	Yes	No	No	No	By public transport	public transport	Yes	No	No	No	Yes	Yes	Yes	Yes	No	No	Yes	Yes	Yes	No	Strongly agree	Strongly agree
290	45	41 - 50	Female	Married	Married	Nurse	Non-physician	20	> 4 years	Diploma	Diploma	6	Private	Yes	Indoor	Indoor	Yes	No	No	No	No	No	No	48 +	>36	Home	Home	Yes	No	No	No	By public transport	public transport	Yes	No	No	No	Yes	Yes	Yes	Yes	Yes	Yes	Yes	Yes	Yes	Yes	Strongly agree	Strongly agree
291	29	21 - 30	Male	Married	Married	Pharmacist	Non-physician	4	< = 4 years	Masters	Bachelor and above	1	Private	Yes	Pharmacy	Pharmacy	No	No	No	Yes	No	No	No	48 +	>36	Home	Home	Yes	No	No	No	By office transport	office transport	No	Yes	No	No	Yes	Yes	Yes	Yes	Yes	Yes	Yes	Yes	Yes	Yes	Neither agree nor disagree	Strongly agree
292	25	21 - 30	Male	Married	Married	Nurse	Non-physician	4	< = 4 years	Diploma	Diploma	3	Private	Yes	Indoor	Indoor	Yes	No	No	No	No	No	No	48 +	>36	Home	Home	Yes	No	No	No	By walk	Walking	No	No	Yes	No	Yes	Yes	Yes	Yes	No	No	Yes	Yes	Yes	Yes	Agree	Strongly agree
293	34	31 - 40	Female	Married	Married	Nurse	Non-physician	10	> 4 years	Diploma	Diploma	5	Private	Yes	Indoor	Indoor	Yes	No	No	No	No	No	No	48 +	>36	Home	Home	Yes	No	No	No	By public transport	public transport	Yes	No	No	No	Yes	Yes	Yes	Yes	Yes	Yes	Yes	Yes	Yes	Yes	Strongly agree	Strongly agree
294	32	31 - 40	Male	Married	Married	Physician	Physician	6	> 4 years	Bachelor	Bachelor and above	1	Government	Yes	Indoor	Indoor	Yes	No	No	No	No	No	No	48 +	>36	Home	Home	Yes	No	No	No	By private vehicle	private transport	No	No	No	Yes	Yes	Yes	Yes	Yes	Yes	Yes	Yes	Yes	Yes	Yes	Strongly agree	Strongly agree
295	28	21 - 30	Male	Married	Married	Physician	Physician	4	< = 4 years	Bachelor	Bachelor and above	3	Government	Yes	Indoor	Indoor	Yes	No	No	No	No	No	No	60 +	>36	Home	Home	Yes	No	No	No	By public transport	public transport	Yes	No	No	No	Yes	Yes	Yes	Yes	Yes	Yes	Yes	Yes	Yes	Yes	Agree	Agree
296	28	21 - 30	Female	Divorced	Single	Physician	Physician	4	< = 4 years	Masters	Bachelor and above	1	Private	Yes	Indoor	Indoor	Yes	No	No	No	No	No	No	48 +	>36	Home	Home	Yes	No	No	No	By office transport	office transport	No	Yes	No	No	Yes	Yes	Yes	Yes	Yes	Yes	Yes	Yes	Yes	Yes	Strongly agree	Strongly agree
297	25	21 - 30	Female	Married	Married	Physician	Physician	1	< = 4 years	Bachelor	Bachelor and above	5	Private	Yes	Indoor	Indoor	Yes	No	No	No	No	No	No	60 +	>36	Hostel	Hostel	No	No	No	Yes	By office transport	office transport	No	Yes	No	No	Yes	Yes	Yes	Yes	Yes	Yes	Yes	No	Yes	Yes	Strongly agree	Agree
298	22	21 - 30	Female	Unmarried	Single	Nurse	Non-physician	1	< = 4 years	Diploma	Diploma	6	Private	Yes	ICU (Intensive Care Unit)	ICU	No	No	No	No	No	Yes	No	60 +	>36	Hostel	Hostel	No	No	No	Yes	By walk	Walking	No	No	Yes	No	Yes	Yes	Yes	Yes	No	Yes	Yes	Yes	Yes	Yes	Strongly agree	Strongly agree
299	26	21 - 30	Female	Married	Married	Nurse	Non-physician	3	< = 4 years	Diploma	Diploma	2	Private	Yes	Indoor	Indoor	Yes	No	No	No	No	No	No	48 +	>36	Home	Home	Yes	No	No	No	By public transport	public transport	Yes	No	No	No	Yes	Yes	Yes	Yes	Yes	Yes	No	Yes	Yes	Yes	Strongly agree	Strongly agree
300	40	31 - 40	Female	Married	Married	Nurse	Non-physician	18	> 4 years	Diploma	Diploma	6	Private	Yes	ICU (Intensive Care Unit)	ICU	No	No	No	No	No	Yes	No	60 +	>36	Home	Home	Yes	No	No	No	By public transport	public transport	Yes	No	No	No	Yes	Yes	Yes	No	Yes	Yes	Yes	Yes	Yes	Yes	Strongly agree	Strongly agree
301	30	21 - 30	Female	Unmarried	Single	Physician	Physician	6	> 4 years	Bachelor	Bachelor and above	1	Government	Yes	Outdoor	Outdoor	No	Yes	No	No	No	No	No	36+	<=36	Dormitory	Dormitory	No	No	Yes	No	By walk	Walking	No	No	Yes	No	Yes	Yes	Yes	Yes	Yes	Yes	Yes	Yes	Yes	Yes	Agree	Strongly agree
302	23	21 - 30	Female	Unmarried	Single	Physician	Physician	0.4	< = 4 years	Bachelor	Bachelor and above	1	Government	Yes	Indoor	Indoor	Yes	No	No	No	No	No	No	60 +	>36	Hostel	Hostel	No	No	No	Yes	By walk	Walking	No	No	Yes	No	Yes	Yes	Yes	Yes	Yes	Yes	Yes	Yes	No	Yes	Strongly agree	Strongly agree
303	26	21 - 30	Male	Unmarried	Single	Physician	Physician	1	< = 4 years	Bachelor	Bachelor and above	1	Government	Yes	Indoor	Indoor	Yes	No	No	No	No	No	No	48 +	>36	Dormitory	Dormitory	No	No	Yes	No	By walk	Walking	No	No	Yes	No	Yes	Yes	Yes	Yes	Yes	Yes	Yes	Yes	Yes	Yes	Strongly agree	Agree
304	24	21 - 30	Female	Unmarried	Single	Physician	Physician	1	< = 4 years	Bachelor	Bachelor and above	4	Government	Yes	Indoor	Indoor	Yes	No	No	No	No	No	No	48 +	>36	Hostel	Hostel	No	No	No	Yes	By walk	Walking	No	No	Yes	No	Yes	Yes	Yes	Yes	Yes	Yes	Yes	Yes	Yes	Yes	Strongly agree	Strongly agree
305	30	21 - 30	Female	Married	Married	Physician	Physician	5	> 4 years	Bachelor	Bachelor and above	3	Private	Yes	Indoor, Outdoor, Emergency	More than one place	Yes	Yes	Yes	No	No	No	Yes	48 +	>36	Home	Home	Yes	No	No	No	By office transport	office transport	No	Yes	No	No	Yes	Yes	Yes	Yes	Yes	Yes	Yes	Yes	No	Yes	Strongly agree	Strongly agree
306	30	21 - 30	Male	Married	Married	Physician	Physician	6	> 4 years	Bachelor	Bachelor and above	9	Government	Yes	Indoor, Outdoor, Emergency	More than one place	Yes	Yes	Yes	No	No	No	Yes	72 +	>36	Hospital	Hospital	No	No	No	No	By public transport	public transport	Yes	No	No	No	Yes	Yes	Yes	Yes	Yes	No	Yes	No	Yes	Yes	Strongly agree	Strongly agree
307	30	21 - 30	Male	Unmarried	Single	Physician	Physician	5	> 4 years	Bachelor	Bachelor and above	4	Private	Yes	Indoor	Indoor	Yes	No	No	No	No	No	No	24 +	<=36	Home	Home	Yes	No	No	No	By office transport	office transport	No	Yes	No	No	Yes	Yes	Yes	Yes	Yes	Yes	Yes	Yes	Yes	Yes	Strongly agree	Strongly agree
308	28	21 - 30	Female	Married	Married	Physician	Physician	2.5	< = 4 years	Bachelor	Bachelor and above	2	Government	Yes	Outdoor	Outdoor	No	Yes	No	No	No	No	No	36+	<=36	Home	Home	Yes	No	No	No	By private vehicle	private transport	No	No	No	Yes	Yes	Yes	Yes	Yes	Yes	Yes	Yes	No	Yes	Yes	Agree	Agree
309	30	21 - 30	Female	Unmarried	Single	Physician	Physician	5	> 4 years	Bachelor	Bachelor and above	3	Government	Yes	Outdoor	Outdoor	No	Yes	No	No	No	No	No	24 +	<=36	Dormitory	Dormitory	No	No	Yes	No	By walk	Walking	No	No	Yes	No	Yes	Yes	Yes	Yes	Yes	Yes	Yes	Yes	Yes	Yes	Agree	Agree
310	33	31 - 40	Male	Married	Married	Physician	Physician	8	> 4 years	Masters	Bachelor and above	2	Government	Yes	Outdoor	Outdoor	No	Yes	No	No	No	No	No	24 +	<=36	Dormitory	Dormitory	No	No	Yes	No	By walk	Walking	No	No	Yes	No	Yes	Yes	Yes	Yes	Yes	Yes	Yes	No	Yes	Yes	Agree	Strongly agree
311	30	21 - 30	Male	Married	Married	Physician	Physician	5	> 4 years	Bachelor	Bachelor and above	6	Government	Yes	Indoor, Outdoor, Emergency	More than one place	Yes	Yes	Yes	No	No	No	Yes	48 +	>36	Dormitory	Dormitory	No	No	Yes	No	By walk	Walking	No	No	Yes	No	Yes	Yes	Yes	Yes	Yes	Yes	Yes	No	No	Yes	Strongly agree	Strongly agree
312	37	31 - 40	Male	Married	Married	Physician	Physician	10	> 4 years	Bachelor	Bachelor and above	5	Government	Yes	Indoor	Indoor	Yes	No	No	No	No	No	No	36+	<=36	Home	Home	Yes	No	No	No	By public transport	public transport	Yes	No	No	No	Yes	Yes	Yes	Yes	Yes	Yes	Yes	No	Yes	Yes	Strongly agree	Agree
313	32	31 - 40	Male	Married	Married	Physician	Physician	8	> 4 years	Masters	Bachelor and above	4	Government	Yes	Indoor	Indoor	Yes	No	No	No	No	No	No	36+	<=36	Home	Home	Yes	No	No	No	By public transport	public transport	Yes	No	No	No	Yes	Yes	Yes	Yes	Yes	Yes	Yes	Yes	Yes	Yes	Agree	Strongly agree
314	30	21 - 30	Female	Married	Married	Physician	Physician	3	< = 4 years	Bachelor	Bachelor and above	5	Government	Yes	Indoor, Outdoor, Emergency	More than one place	Yes	Yes	Yes	No	No	No	Yes	24 +	<=36	Hospital	Hospital	No	No	No	No	By private vehicle	private transport	No	No	No	Yes	Yes	Yes	Yes	Yes	Yes	Yes	Yes	No	No	Yes	Strongly agree	Strongly agree
315	39	31 - 40	Male	Married	Married	Physician	Physician	12	> 4 years	Fellow	Bachelor and above	5	Government	Yes	Indoor	Indoor	Yes	No	No	No	No	No	No	36+	<=36	Home	Home	Yes	No	No	No	By public transport	public transport	Yes	No	No	No	Yes	Yes	Yes	Yes	Yes	Yes	Yes	Yes	Yes	Yes	Strongly agree	Strongly agree
316	40	31 - 40	Male	Married	Married	Physician	Physician	16	> 4 years	Masters	Bachelor and above	9	Government	Yes	Indoor	Indoor	Yes	No	No	No	No	No	No	36+	<=36	Home	Home	Yes	No	No	No	By private vehicle	private transport	No	No	No	Yes	Yes	Yes	Yes	Yes	Yes	Yes	Yes	Yes	Yes	Yes	Agree	Strongly agree
317	30	21 - 30	Female	Married	Married	Physician	Physician	5	> 4 years	Bachelor	Bachelor and above	2	Government	No	Indoor	Indoor	Yes	No	No	No	No	No	No	36+	<=36	Home	Home	Yes	No	No	No	By public transport	public transport	Yes	No	No	No	Yes	Yes	Yes	Yes	Yes	Yes	Yes	No	Yes	Yes	Agree	Agree
318	25	21 - 30	Male	Unmarried	Single	Physician	Physician	0.25	< = 4 years	Bachelor	Bachelor and above	4	Government	No	Indoor	Indoor	Yes	No	No	No	No	No	No	48 +	>36	Hostel	Hostel	No	No	No	Yes	By walk	Walking	No	No	Yes	No	Yes	Yes	Yes	Yes	No	Yes	Yes	No	Yes	Yes	Agree	Agree
319	25	21 - 30	Male	Unmarried	Single	Physician	Physician	#NULL!	#NULL!	Bachelor	Bachelor and above	3	Government	No	Indoor	Indoor	Yes	No	No	No	No	No	No	48 +	>36	Hostel	Hostel	No	No	No	Yes	By walk	Walking	No	No	Yes	No	Yes	Yes	Yes	Yes	No	Yes	Yes	Yes	Yes	Yes	Strongly agree	Strongly agree
320	25	21 - 30	Female	Unmarried	Single	Physician	Physician	#NULL!	#NULL!	Bachelor	Bachelor and above	6	Government	Yes	Indoor	Indoor	Yes	No	No	No	No	No	No	48 +	>36	Home	Home	Yes	No	No	No	By public transport	public transport	Yes	No	No	No	Yes	Yes	Yes	Yes	Yes	Yes	Yes	Yes	Yes	Yes	Agree	Strongly agree
321	25	21 - 30	Female	Unmarried	Single	Physician	Physician	#NULL!	#NULL!	Bachelor	Bachelor and above	3	Government	No	Indoor	Indoor	Yes	No	No	No	No	No	No	48 +	>36	Hostel	Hostel	No	No	No	Yes	By walk	Walking	No	No	Yes	No	Yes	Yes	Yes	Yes	Yes	Yes	Yes	No	Yes	Yes	Strongly agree	Agree
322	32	31 - 40	Male	Unmarried	Single	Physician	Physician	7.5	> 4 years	Bachelor	Bachelor and above	4	Government	Yes	Indoor	Indoor	Yes	No	No	No	No	No	No	48 +	>36	Hotel	Hotel	No	Yes	No	No	By office transport	office transport	No	Yes	No	No	Yes	Yes	Yes	Yes	Yes	Yes	Yes	Yes	Yes	Yes	Strongly agree	Strongly agree
323	28	21 - 30	Male	Unmarried	Single	Physician	Physician	4	< = 4 years	Bachelor	Bachelor and above	1	Government	Yes	Indoor	Indoor	Yes	No	No	No	No	No	No	36+	<=36	Dormitory	Dormitory	No	No	Yes	No	By walk	Walking	No	No	Yes	No	Yes	Yes	Yes	Yes	Yes	Yes	Yes	Yes	Yes	Yes	Agree	Agree
324	25	21 - 30	Female	Unmarried	Single	Physician	Physician	#NULL!	#NULL!	Bachelor	Bachelor and above	3	Government	No	Indoor	Indoor	Yes	No	No	No	No	No	No	36+	<=36	Hostel	Hostel	No	No	No	Yes	By walk	Walking	No	No	Yes	No	Yes	Yes	Yes	Yes	No	Yes	Yes	No	No	Yes	Agree	Strongly agree
325	25	21 - 30	Female	Unmarried	Single	Physician	Physician	0.25	< = 4 years	Bachelor	Bachelor and above	2	Government	No	Indoor	Indoor	Yes	No	No	No	No	No	No	36+	<=36	Hostel	Hostel	No	No	No	Yes	By walk	Walking	No	No	Yes	No	Yes	Yes	Yes	Yes	No	Yes	Yes	No	Yes	Yes	Agree	Strongly agree
326	31	31 - 40	Male	Married	Married	Physician	Physician	6	> 4 years	Bachelor	Bachelor and above	3	Government	Yes	Outdoor, Emergency	More than one place	No	Yes	Yes	No	No	No	Yes	36+	<=36	Home	Home	Yes	No	No	No	By public transport	public transport	Yes	No	No	No	Yes	Yes	Yes	Yes	Yes	Yes	Yes	Yes	Yes	Yes	Agree	Strongly agree
327	31	31 - 40	Male	Unmarried	Single	Physician	Physician	6	> 4 years	Bachelor	Bachelor and above	1	Government	Yes	Outdoor	Outdoor	No	Yes	No	No	No	No	No	36+	<=36	Dormitory	Dormitory	No	No	Yes	No	By walk	Walking	No	No	Yes	No	Yes	Yes	Yes	Yes	Yes	Yes	Yes	Yes	Yes	Yes	Strongly agree	Strongly agree
328	25	21 - 30	Male	Unmarried	Single	Physician	Physician	#NULL!	#NULL!	Bachelor	Bachelor and above	3	Government	No	Indoor	Indoor	Yes	No	No	No	No	No	No	36+	<=36	Hostel	Hostel	No	No	No	Yes	By walk	Walking	No	No	Yes	No	Yes	Yes	Yes	Yes	No	Yes	Yes	No	No	Yes	Agree	Agree
329	25	21 - 30	Male	Unmarried	Single	Physician	Physician	#NULL!	#NULL!	Bachelor	Bachelor and above	5	Government	No	Indoor	Indoor	Yes	No	No	No	No	No	No	36+	<=36	Hostel	Hostel	No	No	No	Yes	By walk	Walking	No	No	Yes	No	Yes	Yes	Yes	Yes	No	Yes	Yes	No	Yes	Yes	Agree	Agree
330	28	21 - 30	Female	Unmarried	Single	Nurse	Non-physician	3	< = 4 years	Diploma	Diploma	4	Private	No	ICU (Intensive Care Unit)	ICU	No	No	No	No	No	Yes	No	12 +	<=36	Hostel	Hostel	No	No	No	Yes	By walk	Walking	No	No	Yes	No	Yes	Yes	Yes	Yes	Yes	Yes	Yes	Yes	Yes	Yes	Strongly agree	Strongly agree
331	24	21 - 30	Female	Married	Married	Nurse	Non-physician	3	< = 4 years	Diploma	Diploma	5	Private	No	Indoor, ICU (Intensive Care Unit)	More than one place	Yes	No	No	No	No	Yes	Yes	12 +	<=36	Hostel	Hostel	No	No	No	Yes	By walk	Walking	No	No	Yes	No	Yes	Yes	Yes	Yes	Yes	Yes	Yes	Yes	Yes	Yes	Strongly agree	Strongly agree
332	23	21 - 30	Female	Unmarried	Single	Nurse	Non-physician	3	< = 4 years	Diploma	Diploma	12	Private	No	ICU (Intensive Care Unit)	ICU	No	No	No	No	No	Yes	No	12 +	<=36	Hostel	Hostel	No	No	No	Yes	By walk	Walking	No	No	Yes	No	Yes	Yes	Yes	Yes	Yes	Yes	Yes	Yes	Yes	Yes	Strongly agree	Strongly agree
333	25	21 - 30	Male	Unmarried	Single	Nurse	Non-physician	2.5	< = 4 years	Diploma	Diploma	6	Private	No	Indoor	Indoor	Yes	No	No	No	No	No	No	12 +	<=36	Hospital	Hospital	No	No	No	No	By walk	Walking	No	No	Yes	No	Yes	Yes	Yes	Yes	Yes	Yes	Yes	Yes	Yes	No	Agree	Agree
334	25	21 - 30	Female	Unmarried	Single	Nurse	Non-physician	2	< = 4 years	Diploma	Diploma	7	Private	No	Indoor	Indoor	Yes	No	No	No	No	No	No	12 +	<=36	Hostel	Hostel	No	No	No	Yes	By walk	Walking	No	No	Yes	No	Yes	Yes	Yes	Yes	Yes	Yes	Yes	Yes	Yes	Yes	Agree	Agree
335	28	21 - 30	Female	Unmarried	Single	Nurse	Non-physician	1	< = 4 years	Diploma	Diploma	4	Private	Yes	Indoor	Indoor	Yes	No	No	No	No	No	No	12 +	<=36	Hostel	Hostel	No	No	No	Yes	By walk	Walking	No	No	Yes	No	Yes	Yes	Yes	Yes	Yes	Yes	Yes	Yes	Yes	Yes	Strongly agree	Agree
336	22	21 - 30	Female	Unmarried	Single	Nurse	Non-physician	2	< = 4 years	Bachelor	Bachelor and above	4	Private	No	ICU (Intensive Care Unit)	ICU	No	No	No	No	No	Yes	No	12 +	<=36	Hostel	Hostel	No	No	No	Yes	By walk	Walking	No	No	Yes	No	Yes	Yes	Yes	Yes	Yes	Yes	Yes	Yes	Yes	Yes	Strongly agree	Strongly agree
337	23	21 - 30	Female	Married	Married	Nurse	Non-physician	2	< = 4 years	Bachelor	Bachelor and above	5	Private	No	ICU (Intensive Care Unit)	ICU	No	No	No	No	No	Yes	No	48 +	>36	Hostel	Hostel	No	No	No	Yes	By walk	Walking	No	No	Yes	No	Yes	Yes	Yes	Yes	Yes	Yes	Yes	Yes	Yes	Yes	Strongly agree	Strongly agree
338	23	21 - 30	Female	Unmarried	Single	Nurse	Non-physician	2	< = 4 years	Diploma	Diploma	6	Private	Yes	Indoor	Indoor	Yes	No	No	No	No	No	No	12 +	<=36	Hostel	Hostel	No	No	No	Yes	By walk	Walking	No	No	Yes	No	Yes	Yes	Yes	Yes	Yes	Yes	Yes	Yes	Yes	Yes	Agree	Strongly agree
339	24	21 - 30	Female	Unmarried	Single	Nurse	Non-physician	5	> 4 years	Diploma	Diploma	9	Private	No	Indoor	Indoor	Yes	No	No	No	No	No	No	12 +	<=36	Hostel	Hostel	No	No	No	Yes	By walk	Walking	No	No	Yes	No	Yes	Yes	Yes	Yes	Yes	Yes	Yes	Yes	Yes	Yes	Agree	Agree
340	23	21 - 30	Female	Unmarried	Single	Nurse	Non-physician	1.2	< = 4 years	Diploma	Diploma	7	Private	No	Indoor	Indoor	Yes	No	No	No	No	No	No	12 +	<=36	Hostel	Hostel	No	No	No	Yes	By walk	Walking	No	No	Yes	No	Yes	Yes	Yes	Yes	Yes	Yes	Yes	Yes	Yes	Yes	Agree	Agree
341	23	21 - 30	Female	Unmarried	Single	Nurse	Non-physician	2	< = 4 years	Diploma	Diploma	11	Private	Yes	Indoor	Indoor	Yes	No	No	No	No	No	No	48 +	>36	Hostel	Hostel	No	No	No	Yes	By walk	Walking	No	No	Yes	No	Yes	Yes	Yes	Yes	Yes	Yes	Yes	No	No	Yes	Strongly agree	Strongly agree
342	24	21 - 30	Female	Unmarried	Single	Nurse	Non-physician	2	< = 4 years	Diploma	Diploma	7	Private	Yes	Indoor	Indoor	Yes	No	No	No	No	No	No	48 +	>36	Hostel	Hostel	No	No	No	Yes	By walk	Walking	No	No	Yes	No	Yes	Yes	Yes	Yes	Yes	Yes	Yes	No	No	Yes	Strongly agree	Strongly agree
343	24	21 - 30	Female	Unmarried	Single	Nurse	Non-physician	1	< = 4 years	Diploma	Diploma	3	Private	Yes	Indoor	Indoor	Yes	No	No	No	No	No	No	12 +	<=36	Hostel	Hostel	No	No	No	Yes	By walk	Walking	No	No	Yes	No	Yes	Yes	Yes	Yes	Yes	Yes	Yes	No	No	Yes	Strongly agree	Strongly agree
344	25	21 - 30	Female	Unmarried	Single	Nurse	Non-physician	1	< = 4 years	Diploma	Diploma	5	Private	Yes	Indoor	Indoor	Yes	No	No	No	No	No	No	12 +	<=36	Hostel	Hostel	No	No	No	Yes	By walk	Walking	No	No	Yes	No	Yes	Yes	Yes	Yes	Yes	Yes	Yes	Yes	Yes	Yes	Strongly agree	Agree
345	23	21 - 30	Female	Unmarried	Single	Nurse	Non-physician	2	< = 4 years	Diploma	Diploma	7	Private	Yes	ICU (Intensive Care Unit)	ICU	No	No	No	No	No	Yes	No	48 +	>36	Hostel	Hostel	No	No	No	Yes	By walk	Walking	No	No	Yes	No	Yes	Yes	Yes	Yes	Yes	Yes	Yes	Yes	Yes	Yes	Strongly agree	Strongly agree
346	22	21 - 30	Male	Unmarried	Single	Nurse	Non-physician	1	< = 4 years	Diploma	Diploma	8	Private	Yes	Indoor	Indoor	Yes	No	No	No	No	No	No	48 +	>36	Hospital	Hospital	No	No	No	No	By walk	Walking	No	No	Yes	No	Yes	Yes	Yes	Yes	Yes	Yes	Yes	Yes	Yes	Yes	Strongly agree	Strongly agree
347	24	21 - 30	Female	Unmarried	Single	Nurse	Non-physician	2	< = 4 years	Diploma	Diploma	7	Private	Yes	Indoor	Indoor	Yes	No	No	No	No	No	No	48 +	>36	Hostel	Hostel	No	No	No	Yes	By walk	Walking	No	No	Yes	No	Yes	Yes	Yes	Yes	Yes	Yes	Yes	No	No	Yes	Strongly agree	Strongly agree
348	24	21 - 30	Female	Unmarried	Single	Nurse	Non-physician	2	< = 4 years	Diploma	Diploma	11	Private	Yes	Indoor	Indoor	Yes	No	No	No	No	No	No	48 +	>36	Hostel	Hostel	No	No	No	Yes	By walk	Walking	No	No	Yes	No	Yes	Yes	Yes	Yes	Yes	Yes	Yes	No	No	Yes	Strongly disagree	Strongly disagree
349	24	21 - 30	Female	Married	Married	Nurse	Non-physician	6	> 4 years	Diploma	Diploma	7	Private	Yes	Indoor	Indoor	Yes	No	No	No	No	No	No	48 +	>36	Hostel	Hostel	No	No	No	Yes	By walk	Walking	No	No	Yes	No	Yes	Yes	Yes	Yes	Yes	Yes	Yes	No	No	Yes	Strongly agree	Strongly disagree
350	26	21 - 30	Female	Unmarried	Single	Physician	Physician	1	< = 4 years	Bachelor	Bachelor and above	4	Private	Yes	Indoor	Indoor	Yes	No	No	No	No	No	No	24 +	<=36	Home	Home	Yes	No	No	No	By office transport	office transport	No	Yes	No	No	Yes	Yes	Yes	Yes	Yes	Yes	Yes	Yes	Yes	Yes	Strongly agree	Strongly agree
351	27	21 - 30	Female	Unmarried	Single	Physician	Physician	2.5	< = 4 years	Bachelor	Bachelor and above	6	Private	Yes	Indoor	Indoor	Yes	No	No	No	No	No	No	24 +	<=36	Home	Home	Yes	No	No	No	By office transport	office transport	No	Yes	No	No	Yes	Yes	Yes	Yes	Yes	Yes	Yes	Yes	Yes	Yes	Strongly agree	Strongly agree
352	27	21 - 30	Male	Unmarried	Single	Physician	Physician	2	< = 4 years	Bachelor	Bachelor and above	4	Private	Yes	Indoor	Indoor	Yes	No	No	No	No	No	No	24 +	<=36	Home	Home	Yes	No	No	No	By office transport	office transport	No	Yes	No	No	Yes	Yes	Yes	Yes	Yes	Yes	Yes	Yes	Yes	Yes	Strongly agree	Strongly agree
353	29	21 - 30	Male	Unmarried	Single	Physician	Physician	5	> 4 years	Bachelor	Bachelor and above	6	Private	Yes	Indoor, Emergency	More than one place	Yes	No	Yes	No	No	No	Yes	36+	<=36	Home	Home	Yes	No	No	No	By private vehicle	private transport	No	No	No	Yes	Yes	Yes	Yes	Yes	Yes	Yes	Yes	Yes	Yes	Yes	Strongly agree	Strongly agree
354	25	21 - 30	Female	Unmarried	Single	Physician	Physician	0.3	< = 4 years	Bachelor	Bachelor and above	4	Government	Yes	Indoor	Indoor	Yes	No	No	No	No	No	No	48 +	>36	Hostel	Hostel	No	No	No	Yes	By walk	Walking	No	No	Yes	No	Yes	Yes	Yes	Yes	Yes	Yes	Yes	No	Yes	Yes	Agree	Strongly agree
355	28	21 - 30	Male	Unmarried	Single	Physician	Physician	4	< = 4 years	Bachelor	Bachelor and above	6	Private	Yes	Indoor	Indoor	Yes	No	No	No	No	No	No	36+	<=36	Home	Home	Yes	No	No	No	By office transport	office transport	No	Yes	No	No	Yes	Yes	Yes	Yes	Yes	Yes	Yes	Yes	Yes	Yes	Strongly agree	Strongly agree
356	30	21 - 30	Male	Unmarried	Single	Physician	Physician	6	> 4 years	Bachelor	Bachelor and above	4	Private	Yes	Indoor	Indoor	Yes	No	No	No	No	No	No	24 +	<=36	Home	Home	Yes	No	No	No	By office transport	office transport	No	Yes	No	No	Yes	Yes	Yes	Yes	Yes	Yes	Yes	Yes	Yes	Yes	Strongly agree	Strongly agree
357	36	31 - 40	Male	Married	Married	Physician	Physician	11	> 4 years	Fellow	Bachelor and above	4	Private	Yes	Indoor, ICU (Intensive Care Unit)	More than one place	Yes	No	No	No	No	Yes	Yes	36+	<=36	Home	Home	Yes	No	No	No	By office transport	office transport	No	Yes	No	No	Yes	Yes	Yes	Yes	Yes	Yes	Yes	Yes	Yes	Yes	Agree	Strongly agree
358	23	21 - 30	Female	Unmarried	Single	Nurse	Non-physician	6	> 4 years	Diploma	Diploma	6	Private	Yes	Indoor	Indoor	Yes	No	No	No	No	No	No	12 +	<=36	Hostel	Hostel	No	No	No	Yes	By walk	Walking	No	No	Yes	No	Yes	Yes	Yes	Yes	Yes	Yes	Yes	Yes	Yes	Yes	Strongly agree	Agree
359	23	21 - 30	Female	Unmarried	Single	Nurse	Non-physician	1	< = 4 years	Diploma	Diploma	5	Private	Yes	Indoor	Indoor	Yes	No	No	No	No	No	No	12 +	<=36	Hostel	Hostel	No	No	No	Yes	By walk	Walking	No	No	Yes	No	Yes	Yes	Yes	Yes	Yes	Yes	Yes	Yes	Yes	Yes	Strongly agree	Agree
360	24	21 - 30	Female	Unmarried	Single	Physician	Physician	#NULL!	#NULL!	Bachelor	Bachelor and above	3	Government	No	Indoor	Indoor	Yes	No	No	No	No	No	No	48 +	>36	Hostel	Hostel	No	No	No	Yes	By walk	Walking	No	No	Yes	No	Yes	Yes	Yes	Yes	No	Yes	No	No	Yes	Yes	Agree	Agree
361	24	21 - 30	Female	Unmarried	Single	Nurse	Non-physician	3	< = 4 years	Diploma	Diploma	5	Private	Yes	Indoor	Indoor	Yes	No	No	No	No	No	No	48 +	>36	Hostel	Hostel	No	No	No	Yes	By walk	Walking	No	No	Yes	No	Yes	Yes	Yes	Yes	Yes	Yes	Yes	Yes	Yes	Yes	Strongly agree	Agree
362	25	21 - 30	Female	Unmarried	Single	Nurse	Non-physician	4	< = 4 years	Diploma	Diploma	6	Private	Yes	Indoor	Indoor	Yes	No	No	No	No	No	No	48 +	>36	Hostel	Hostel	No	No	No	Yes	By walk	Walking	No	No	Yes	No	Yes	Yes	Yes	Yes	Yes	Yes	Yes	Yes	Yes	Yes	Strongly agree	Agree
363	25	21 - 30	Female	Unmarried	Single	Nurse	Non-physician	2.5	< = 4 years	Diploma	Diploma	8	Government	No	Indoor	Indoor	Yes	No	No	No	No	No	No	36+	<=36	Hostel	Hostel	No	No	No	Yes	By walk	Walking	No	No	Yes	No	Yes	Yes	Yes	Yes	No	Yes	Yes	Yes	No	Yes	Agree	Strongly agree
364	29	21 - 30	Female	Married	Married	Nurse	Non-physician	9	> 4 years	Bachelor	Bachelor and above	2	Government	Yes	Indoor	Indoor	Yes	No	No	No	No	No	No	36+	<=36	Hostel	Hostel	No	No	No	Yes	By walk	Walking	No	No	Yes	No	Yes	Yes	Yes	Yes	Yes	Yes	Yes	Yes	Yes	Yes	Agree	Strongly agree
365	28	21 - 30	Male	Unmarried	Single	Physician	Physician	4	< = 4 years	Bachelor	Bachelor and above	5	Private	Yes	Indoor	Indoor	Yes	No	No	No	No	No	No	36+	<=36	Home	Home	Yes	No	No	No	By public transport	public transport	Yes	No	No	No	Yes	Yes	Yes	Yes	Yes	Yes	Yes	Yes	Yes	Yes	Strongly agree	Strongly agree
366	26	21 - 30	Female	Married	Married	Nurse	Non-physician	3	< = 4 years	Diploma	Diploma	2	Government	No	Indoor	Indoor	Yes	No	No	No	No	No	No	36+	<=36	Home	Home	Yes	No	No	No	By public transport	public transport	Yes	No	No	No	Yes	Yes	Yes	Yes	No	Yes	Yes	No	Yes	Yes	Agree	Strongly agree
367	23	21 - 30	Female	Married	Married	Nurse	Non-physician	2	< = 4 years	Diploma	Diploma	2	Private	No	Indoor	Indoor	Yes	No	No	No	No	No	No	48 +	>36	Home	Home	Yes	No	No	No	By private vehicle	private transport	No	No	No	Yes	Yes	Yes	Yes	Yes	Yes	Yes	Yes	Yes	No	Yes	Strongly agree	Strongly agree
368	25	21 - 30	Female	Unmarried	Single	Nurse	Non-physician	3	< = 4 years	Diploma	Diploma	5	Private	Yes	Indoor	Indoor	Yes	No	No	No	No	No	No	48 +	>36	Hostel	Hostel	No	No	No	Yes	By walk	Walking	No	No	Yes	No	Yes	Yes	Yes	Yes	Yes	Yes	Yes	Yes	Yes	Yes	Strongly agree	Agree
369	24	21 - 30	Female	Unmarried	Single	Nurse	Non-physician	6	> 4 years	Diploma	Diploma	5	Private	Yes	Indoor	Indoor	Yes	No	No	No	No	No	No	12 +	<=36	Hostel	Hostel	No	No	No	Yes	By walk	Walking	No	No	Yes	No	Yes	Yes	Yes	Yes	Yes	Yes	Yes	Yes	Yes	Yes	Strongly agree	Agree
370	26	21 - 30	Female	Unmarried	Single	Nurse	Non-physician	6	> 4 years	Diploma	Diploma	4	Private	Yes	Indoor	Indoor	Yes	No	No	No	No	No	No	12 +	<=36	Hostel	Hostel	No	No	No	Yes	By walk	Walking	No	No	Yes	No	Yes	Yes	Yes	Yes	Yes	Yes	Yes	Yes	Yes	Yes	Strongly agree	Strongly agree
371	24	21 - 30	Female	Unmarried	Single	Nurse	Non-physician	2.5	< = 4 years	Diploma	Diploma	10	Private	No	Indoor	Indoor	Yes	No	No	No	No	No	No	12 +	<=36	Hostel	Hostel	No	No	No	Yes	By walk	Walking	No	No	Yes	No	Yes	Yes	Yes	Yes	Yes	Yes	Yes	Yes	Yes	Yes	Strongly agree	Strongly agree
372	25	21 - 30	Female	Unmarried	Single	Nurse	Non-physician	6	> 4 years	Diploma	Diploma	6	Private	Yes	Indoor	Indoor	Yes	No	No	No	No	No	No	12 +	<=36	Hostel	Hostel	No	No	No	Yes	By walk	Walking	No	No	Yes	No	Yes	Yes	Yes	Yes	Yes	Yes	Yes	Yes	Yes	Yes	Strongly agree	Strongly agree
373	30	21 - 30	Male	Unmarried	Single	Physician	Physician	6	> 4 years	Bachelor	Bachelor and above	6	Private	Yes	ICU (Intensive Care Unit)	ICU	No	No	No	No	No	Yes	No	48 +	>36	Home	Home	Yes	No	No	No	By public transport	public transport	Yes	No	No	No	Yes	Yes	Yes	Yes	Yes	Yes	Yes	Yes	Yes	Yes	Strongly agree	Strongly agree
374	25	21 - 30	Female	Unmarried	Single	Nurse	Non-physician	4	< = 4 years	Diploma	Diploma	6	Government	No	Indoor	Indoor	Yes	No	No	No	No	No	No	36+	<=36	Hostel	Hostel	No	No	No	Yes	By walk	Walking	No	No	Yes	No	Yes	Yes	Yes	Yes	No	Yes	Yes	No	Yes	Yes	Agree	Strongly agree
375	27	21 - 30	Female	Married	Married	Nurse	Non-physician	3	< = 4 years	Bachelor	Bachelor and above	2	Government	Yes	Indoor	Indoor	Yes	No	No	No	No	No	No	36+	<=36	Home	Home	Yes	No	No	No	By public transport	public transport	Yes	No	No	No	Yes	Yes	Yes	Yes	Yes	Yes	Yes	Yes	Yes	Yes	Strongly agree	Strongly agree
376	25	21 - 30	Female	Unmarried	Single	Nurse	Non-physician	3	< = 4 years	Diploma	Diploma	5	Private	No	Indoor	Indoor	Yes	No	No	No	No	No	No	12 +	<=36	Hostel	Hostel	No	No	No	Yes	By walk	Walking	No	No	Yes	No	Yes	Yes	Yes	Yes	Yes	Yes	Yes	Yes	Yes	Yes	Strongly agree	Strongly agree
377	26	21 - 30	Female	Unmarried	Single	Nurse	Non-physician	6	> 4 years	Diploma	Diploma	7	Private	Yes	Indoor	Indoor	Yes	No	No	No	No	No	No	12 +	<=36	Hostel	Hostel	No	No	No	Yes	By walk	Walking	No	No	Yes	No	Yes	Yes	Yes	Yes	Yes	Yes	Yes	Yes	Yes	Yes	Strongly agree	Strongly agree
378	24	21 - 30	Female	Unmarried	Single	Nurse	Non-physician	2.5	< = 4 years	Diploma	Diploma	7	Private	No	Indoor	Indoor	Yes	No	No	No	No	No	No	48 +	>36	Hostel	Hostel	No	No	No	Yes	By walk	Walking	No	No	Yes	No	Yes	Yes	Yes	Yes	Yes	Yes	Yes	Yes	Yes	Yes	Strongly agree	Strongly agree
379	27	21 - 30	Female	Unmarried	Single	Nurse	Non-physician	7	> 4 years	Diploma	Diploma	5	Private	Yes	Indoor	Indoor	Yes	No	No	No	No	No	No	12 +	<=36	Hostel	Hostel	No	No	No	Yes	By walk	Walking	No	No	Yes	No	Yes	Yes	Yes	Yes	Yes	Yes	Yes	Yes	Yes	Yes	Strongly agree	Strongly agree
380	27	21 - 30	Female	Unmarried	Single	Nurse	Non-physician	7	> 4 years	Diploma	Diploma	7	Private	Yes	Indoor	Indoor	Yes	No	No	No	No	No	No	12 +	<=36	Hostel	Hostel	No	No	No	Yes	By walk	Walking	No	No	Yes	No	Yes	Yes	Yes	Yes	Yes	Yes	Yes	Yes	Yes	Yes	Strongly agree	Strongly agree
381	26	21 - 30	Male	Married	Married	Nurse	Non-physician	3	< = 4 years	Diploma	Diploma	2	Private	Yes	Outdoor	Outdoor	No	Yes	No	No	No	No	No	48 +	>36	Home	Home	Yes	No	No	No	By public transport	public transport	Yes	No	No	No	Yes	Yes	Yes	Yes	Yes	No	No	Yes	Yes	Yes	Strongly agree	Strongly agree
382	32	31 - 40	Female	Married	Married	Nurse	Non-physician	11	> 4 years	Diploma	Diploma	8	Private	No	Outdoor	Outdoor	No	Yes	No	No	No	No	No	48 +	>36	Hostel	Hostel	No	No	No	Yes	By public transport	public transport	Yes	No	No	No	Yes	Yes	Yes	Yes	Yes	Yes	No	Yes	Yes	Yes	Strongly agree	Strongly agree
383	25	21 - 30	Female	Married	Married	Nurse	Non-physician	4	< = 4 years	Diploma	Diploma	6	Private	No	Outdoor	Outdoor	No	Yes	No	No	No	No	No	48 +	>36	Hostel	Hostel	No	No	No	Yes	By public transport	public transport	Yes	No	No	No	Yes	Yes	Yes	No	Yes	Yes	Yes	Yes	Yes	Yes	Strongly agree	Strongly agree
384	30	21 - 30	Female	Married	Married	Nurse	Non-physician	8	> 4 years	Diploma	Diploma	3	Private	No	Outdoor	Outdoor	No	Yes	No	No	No	No	No	48 +	>36	Home	Home	Yes	No	No	No	By public transport	public transport	Yes	No	No	No	Yes	Yes	Yes	Yes	Yes	No	No	No	Yes	Yes	Agree	Agree
385	22	21 - 30	Female	Unmarried	Single	Nurse	Non-physician	1	< = 4 years	Diploma	Diploma	3	Private	No	Outdoor	Outdoor	No	Yes	No	No	No	No	No	48 +	>36	Home	Home	Yes	No	No	No	By walk	Walking	No	No	Yes	No	Yes	Yes	No	Yes	Yes	Yes	Yes	Yes	No	No	Strongly agree	Strongly agree
386	38	31 - 40	Female	Married	Married	Nurse	Non-physician	15	> 4 years	Diploma	Diploma	4	Private	Yes	Outdoor	Outdoor	No	Yes	No	No	No	No	No	48 +	>36	Home	Home	Yes	No	No	No	By public transport	public transport	Yes	No	No	No	Yes	Yes	Yes	Yes	Yes	No	Yes	Yes	Yes	Yes	Agree	Strongly agree
387	24	21 - 30	Male	Married	Married	Nurse	Non-physician	2	< = 4 years	Diploma	Diploma	2	Private	Yes	Indoor	Indoor	Yes	No	No	No	No	No	No	48 +	>36	Home	Home	Yes	No	No	No	By public transport	public transport	Yes	No	No	No	Yes	Yes	Yes	Yes	Yes	Yes	Yes	No	No	No	Strongly agree	Agree
388	29	21 - 30	Female	Married	Married	Nurse	Non-physician	6	> 4 years	Diploma	Diploma	4	Private	Yes	Indoor	Indoor	Yes	No	No	No	No	No	No	48 +	>36	Home	Home	Yes	No	No	No	By walk	Walking	No	No	Yes	No	Yes	No	No	Yes	Yes	Yes	Yes	Yes	Yes	Yes	Strongly agree	Strongly agree
389	43	41 - 50	Female	Widowed	Single	Nurse	Non-physician	18	> 4 years	Diploma	Diploma	6	Private	Yes	Indoor	Indoor	Yes	No	No	No	No	No	No	48 +	>36	Home	Home	Yes	No	No	No	By walk	Walking	No	No	Yes	No	Yes	Yes	Yes	Yes	Yes	No	Yes	Yes	Yes	Yes	Strongly agree	Strongly agree
390	24	21 - 30	Female	Married	Married	Nurse	Non-physician	2	< = 4 years	Diploma	Diploma	2	Private	Yes	Indoor	Indoor	Yes	No	No	No	No	No	No	48 +	>36	Home	Home	Yes	No	No	No	By public transport	public transport	Yes	No	No	No	Yes	Yes	Yes	Yes	Yes	No	Yes	Yes	Yes	Yes	Strongly agree	Agree
391	24	21 - 30	Female	Married	Married	Nurse	Non-physician	1	< = 4 years	Diploma	Diploma	1	Private	Yes	Outdoor	Outdoor	No	Yes	No	No	No	No	No	48 +	>36	Home	Home	Yes	No	No	No	By walk	Walking	No	No	Yes	No	Yes	Yes	Yes	Yes	Yes	No	Yes	Yes	No	Yes	Strongly agree	Strongly agree
392	34	31 - 40	Male	Married	Married	Nurse	Non-physician	12	> 4 years	Diploma	Diploma	5	Private	No	Indoor	Indoor	Yes	No	No	No	No	No	No	48 +	>36	Home	Home	Yes	No	No	No	By public transport	public transport	Yes	No	No	No	Yes	Yes	Yes	Yes	Yes	No	No	Yes	Yes	Yes	Strongly agree	Agree
393	24	21 - 30	Male	Unmarried	Single	Nurse	Non-physician	1	< = 4 years	Diploma	Diploma	1	Private	No	Indoor	Indoor	Yes	No	No	No	No	No	No	48 +	>36	Home	Home	Yes	No	No	No	By public transport	public transport	Yes	No	No	No	Yes	Yes	Yes	Yes	Yes	Yes	No	Yes	Yes	No	Strongly agree	Strongly agree
[truncated: 27 more columns]
